# Supplementary material
Source: PubMed Central journal article supplement (PMC5908213)
Supplement: NIHMS956855-supplement-PROTOCOL.pdf [file NIHMS956855-supplement-PROTOCOL.pdf]

# **SCI-seq: Sequencing thousands of single-cell genomes with combinatorial indexing**

Sarah A. Vitak<sup>1</sup>, Kristof A. Torkenczy<sup>1,2</sup>, Andrew J. Fields<sup>1</sup>, Lena Christiansen<sup>3</sup>, Frank J. Steemers<sup>3</sup>, and Andrew Adey<sup>1,4†</sup>

1) Department of Molecular & Medical Genetics, Oregon Health & Science University, Portland, OR, USA

2) Program in Molecular & Cellular Biosciences, Oregon Health & Science University, Portland, OR, USA

3) Advanced Research Group, Illumina Inc., San Diego, CA, USA

4) Knight Cardiovascular Institute, Portland, OR, USA

## **Abstract**

Single-cell genome sequencing has proven valuable for the detection of somatic variation, particularly in the context of tumor evolution. Current technologies suffer from high library construction costs which restrict the number of cells that can be assessed and thus impose limitations on the ability to measure heterogeneity within a tissue. Here, we present Single cell Combinatorial Indexed Sequencing (SCI-seq) as a means of simultaneously generating thousands of low-pass single cell libraries for somatic copy number variant detection.

## **Introduction**

Here we present the protocol for Single cell Combinatorial Indexing and Sequencing (SCI-seq) as a means of producing thousands of low-pass single cell genome sequencing libraries for the purpose of copy number variant and aneuploidy detection. The protocol requires nucleosome depletion in order to provide uniform sequence reads throughout the genome. We provide two alternative methods: Lithium Assisted Nucleosome Depletion (LAND) and crosslinking with SDS (xSDS). LAND typically produces greater read counts per cell at the cost of decreased coverage uniformity, whereas xSDS produced more uniform coverage at the cost of reduced read counts.

## **Reagents**

- Phosphate Buffer Saline (PBS, Thermo Fisher, Cat. 10010023)
- 0.25% Trypsin (Thermo Fisher, Cat. 15050057)
- Tris (Fisher, Cat. T1503)
- HCl (Fisher, Cat. A144)
- NaCl (Fisher, Cat. M-11624)
- MgCl<sub>2</sub> (Sigma, Cat. M8226)
- Igepal CA-630 (Sigma, I8896)
- Protease Inhibitors (Roche, Cat. 11873580001)
- Lithium 3,5-diiodosalicylic acid (Sigma, Cat. D3635) - LAND Only
- Formaldehyde (Sigma, Cat. F8775) – xSDS Only
- Glycine (Sigma, Cat. G8898) – xSDS Only
- HEPES (Fisher, Cat. BP310) – xSDS Only
- NEBuffer 2.1 (NEB, Cat. B7202) – xSDS Only
- SDS (Sigma, Cat. L3771) – xSDS Only
- Triton-X100 (Sigma, Cat. 9002-93-1) – xSDS Only
- DAPI (Thermo Fisher, Cat. D1306)
- TD buffer and NPM from Nextera kit (Illumina, Cat. FC-121-1031)
- 96 Indexed Transposomes (either assembled using published methods or obtained from Illumina, oligos shown in Table 1)
- Indexed i5 and i7 PCR primers (Table 2)
- SYBR Green (FMC BioProducts, Cat. 50513)
- Qiaquick PCR purification kit (Qiagen, Cat. 28104)
- dsDNA High Sensitivity qubit (Thermo Fisher, Cat. Q32851)
- High Sensitivity Bioanalyzer kit (Agilent, Cat. 5067-4626)
- NextSeq sequencing kit (High or Mid 150-cycle)
- Sequencing primers (Table 3)

## **Equipment**

- Dounce Homogenizer
- 35µM Cell Strainer (BD Biosciences, Cat. 352235)
- Sony SH800 cell sorter (Sony Biotechnology, Cat. SH800) or other FACS instrument capable of DAPI-based single nuclei sorting
- CFX Connect RT Thermal Cycler (Bio-Rad, Cat. 1855200) or other real time thermocycler
- Qubit 2.0 Fluorometer (Thermo Fisher, Cat. Q32866)
- 2100 Bioanalyzer (Agilent, Cat. G2939A)
- NextSeq 500 (Illumina, Cat. SY-415-1001)

## Procedure

### 1) Preparation of Nucleosome Depleted Nuclei (i: LAND or ii: xSDS)

#### i) LAND Nuclei Preparation & Nucleosome Depletion

| <u>Suspension Cell Culture</u>                                                                                                                                         | <u>Adherent Cell Culture</u>                                                                                                                                                                                                                                                                                                                                                                                | <u>Tissue Sample</u>                                                                                                                                                                                                                                                                                                                                                                                                                                       |
|------------------------------------------------------------------------------------------------------------------------------------------------------------------------|-------------------------------------------------------------------------------------------------------------------------------------------------------------------------------------------------------------------------------------------------------------------------------------------------------------------------------------------------------------------------------------------------------------|------------------------------------------------------------------------------------------------------------------------------------------------------------------------------------------------------------------------------------------------------------------------------------------------------------------------------------------------------------------------------------------------------------------------------------------------------------|
| <p>a) Triturate gently to break up cell clumps.</p> <p>b) Pellet cells by spinning at 500xg for 5 minutes.</p> <p>c) Wash with 500 <math>\mu</math>L ice cold PBS.</p> | <p>a) Aspirate media and wash cells with 10 mL of PBS at 37°.</p> <p>b) Add enough 0.25% Trypsin at 37° to cover monolayer.</p> <p>c) Incubate at 37° for 5 minutes or until 90% of cells are no longer adhering to surface.</p> <p>d) Add 37° media at 1:1 ratio to quench Trypsin.</p> <p>e) Pellet cells by spinning at 500xg for 5 minutes.</p> <p>f) Wash with 500 <math>\mu</math>L ice cold PBS.</p> | <p>a) Place tissue sample in 2 mL dounce homogenizer on ice.</p> <p>b) Add 2 mL of NIB buffer (10mM TrisHCl pH7.4, 10mM NaCl, 3mM MgCl<sub>2</sub>, 0.1% igeal, 1x protease inhibitors) to sample and allow to incubate on ice for 5 minutes.</p> <p>c) Dounce 5 times with loose pestle followed by 15 strokes with tight pestle.</p> <p>d) Put sample through 35<math>\mu</math>M cell strainer. (it may be necessary to use more than one strainer)</p> |

- a) Pellet cells or nuclei by spinning at 500xg for 5 minutes.
- b) Resuspend in 200  $\mu$ L 12.5 mM LIS in NIB buffer (2.5  $\mu$ L 1M LIS + 197.5  $\mu$ L NIB buffer).
- c) Incubate on ice for 5 minutes.
- d) Add 800  $\mu$ L NIB buffer and 5  $\mu$ L DAPI(5 mg/mL).
- e) Gently pass through 35 $\mu$ M cell strainer.

## ii) xSDS Nuclei Preparation & Nucleosome Depletion

| <u>Suspension Cell Culture</u>                                                                                                                                                                                                                                                                                                                                                                                                                                                                                                                                                                        | <u>Adherent Cell Culture</u>                                                                                                                                                                                                                                                                                                                                                                                                                                                                                                                                                                                                                                                                                                                                                               | <u>Tissue Sample</u>                                                                                                                                                                                                                                                                                                                                                                                                                                                                                                                                                                                                                                                  |
|-------------------------------------------------------------------------------------------------------------------------------------------------------------------------------------------------------------------------------------------------------------------------------------------------------------------------------------------------------------------------------------------------------------------------------------------------------------------------------------------------------------------------------------------------------------------------------------------------------|--------------------------------------------------------------------------------------------------------------------------------------------------------------------------------------------------------------------------------------------------------------------------------------------------------------------------------------------------------------------------------------------------------------------------------------------------------------------------------------------------------------------------------------------------------------------------------------------------------------------------------------------------------------------------------------------------------------------------------------------------------------------------------------------|-----------------------------------------------------------------------------------------------------------------------------------------------------------------------------------------------------------------------------------------------------------------------------------------------------------------------------------------------------------------------------------------------------------------------------------------------------------------------------------------------------------------------------------------------------------------------------------------------------------------------------------------------------------------------|
| <p>a) Triturate gently to break up cell clumps.</p> <p>b) To 10 mL of cells in media add 406 <math>\mu</math>L of 37% formaldehyde and incubate at room temp for 10 minutes with gentle shaking.</p> <p>c) Add 800 <math>\mu</math>L of 2.5 M Glycine and incubate on ice for 5 minutes.</p> <p>d) Centrifuge at 550xg for 8 minutes at 4°.</p> <p>e) Wash with 10 mL of ice cold PBS.</p> <p>f) Resuspend cells in 5 mL of ice cold NIB (10mM TrisHCl pH7.4, 10MM NaCl, 3mM MgCl<sub>2</sub>, 0.1% igepal, 1x protease inhibitors).</p> <p>g) Incubate on ice for 20 minutes with gentle mixing.</p> | <p>a) Aspirate media and wash cells with 10 mL of PBS at 37°.</p> <p>b) Add enough 0.25% Trypsin at 37° to cover monolayer.</p> <p>c) Incubate at 37° for 5 minutes or until 90% of cells are no longer adhering to surface.</p> <p>d) Add 37° media at 1:1 ratio to quench Trypsin.</p> <p>e) Bring volume to 10ml with media.</p> <p>f) Resuspend in 10 mL media, add 406 <math>\mu</math>L of 37% formaldehyde, and incubate at room temp for 10 minutes with gentle shaking.</p> <p>g) Add 800 <math>\mu</math>L of 2.5 M Glycine and incubate on ice for 5 minutes.</p> <p>h) Centrifuge at 550xg for 8 minutes at 4°.</p> <p>i) Wash with 10 mL of ice cold PBS.</p> <p>j) Resuspend cells in 5 mL of ice cold NIB.</p> <p>k) Incubate on ice for 20 minutes with gentle mixing.</p> | <p>a) Place tissue sample in 2 mL dounce homogenizer on ice.</p> <p>b) Add 2 mL of HEPES NIB (20mM HEPES, 10MM NaCl, 3mM MgCl<sub>2</sub>, 0.1% igepal, 1x protease inhibitors) buffer to sample and allow to incubate on ice for 5 minutes.</p> <p>c) Dounce 5 times with loose pestle followed by 15 strokes with tight pestle.</p> <p>d) Put sample through 35<math>\mu</math>M cell strainer. (it may be necessary to use more than one strainer)</p> <p>e) Bring volume up to 10ml with HEPES-NIB</p> <p>f) To the 10 ml, add 406 <math>\mu</math>L of 37% formaldehyde.</p> <p>g) Add 800 <math>\mu</math>L of 2.5 M Glycine and incubate on ice 5 minutes.</p> |

- f) Pellet cells or nuclei by spinning at 500xg for 5 minutes and wash with 900  $\mu$ L of 1x NEBuffer 2.1
- g) Spin 500 x g for 5 minutes.
- h) Resuspend in 800  $\mu$ L 1x NEBuffer 2.1 with 12  $\mu$ L of 20% SDS and incubate at 42°C with vigorous shaking for 30 minutes.

- i) Add 200  $\mu\text{L}$  of 10% Triton-X and incubate at 42°C with vigorous shaking for 30 minutes.
- j) Add 5  $\mu\text{L}$  of 5mg/mL DAPI and pass through a t 35  $\mu\text{m}$  cell strainer.

## 2) Sorting and Tagmentation

- a) Prep tagmentation plate with 10  $\mu\text{L}$  1x TD buffer (for 1 plate: 500  $\mu\text{L}$  NIB buffer + 500  $\mu\text{L}$  TD buffer)
- b) Sort 2000 single nuclei into each well of the tagmentation plate.  
NOTE: At this step the number of nuclei per well can be varied slightly as long as the number of nuclei per well is consistent for the whole plate.

Gating scheme as follows:

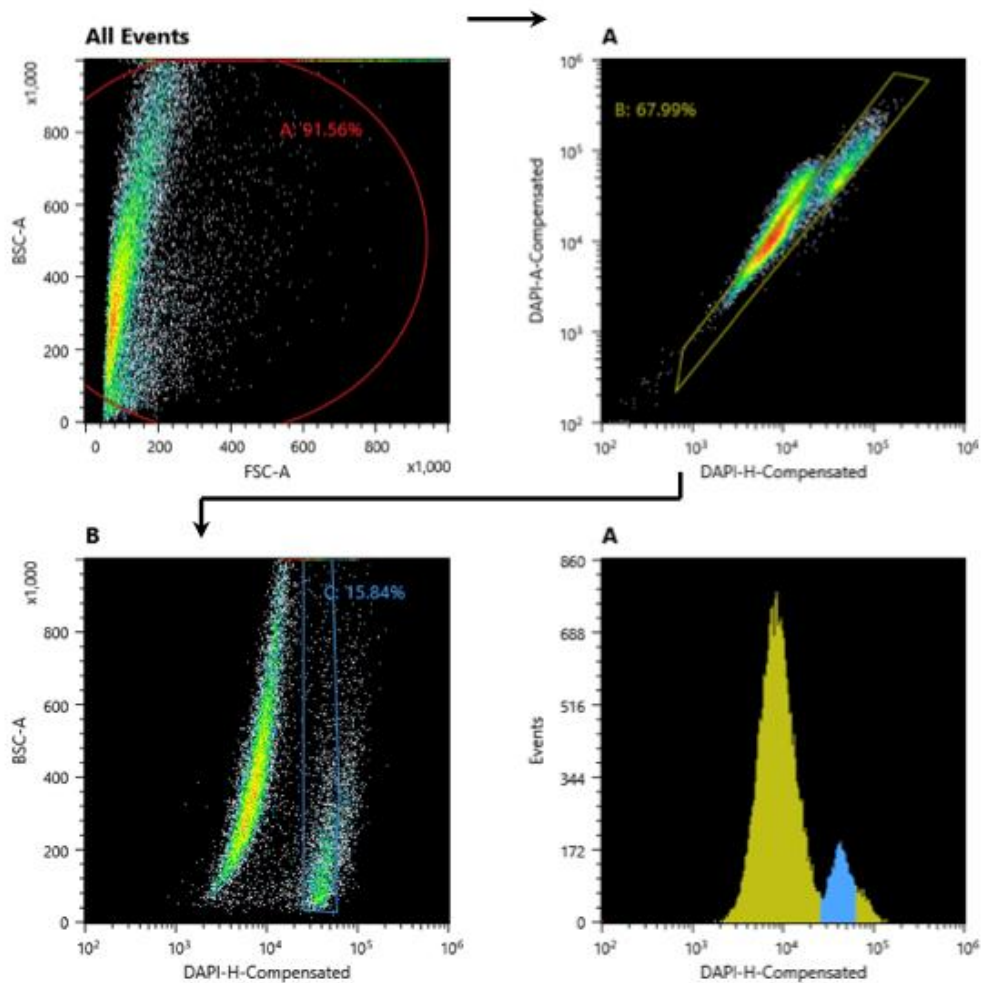

- c) Spin down plate.
- d) Add 1  $\mu\text{L}$  2.5  $\mu\text{M}$  of uniquely indexed transposome to each well.
- e) Seal plate and incubate at 55° for 15 minutes with gentle shaking.
- f) Let plate return to room temperature then place on ice.
- g) Pool all wells, add 5  $\mu\text{L}$  DAPI(5 mg/mL), and pass through 35 $\mu\text{m}$  cell strainer.

### 3) Second Sort and PCR Indexing

- a) Prepare a master mix for each well with:
  - I. 0.25  $\mu$ L 20mg/mL BSA
  - II. 0.5  $\mu$ L 1% SDS
  - III. 7.75  $\mu$ L H<sub>2</sub>O
- b) Add 8.5  $\mu$ L of master mix and 2.5  $\mu$ L of each (i5 and i7) 10  $\mu$ M primer to each well of a 96 well plate.
- c) Sort 15-22 single nuclei into each well using the most stringent sort settings.
- d) Spin down plate.
- e) LAND ONLY: Incubate for 5 min at 55° to denature transposase.
- f) xSDS ONLY: Incubate at 68° for 45 minutes to denature transposase and reverse crosslinks.
- g) Add 12  $\mu$ L (7.5  $\mu$ L NPM + 4  $\mu$ L H<sub>2</sub>O + 0.5  $\mu$ L 100x sybr green) to each well of strip tube (for 1 plate: 750  $\mu$ L NPM + 400  $\mu$ L H<sub>2</sub>O + 50  $\mu$ L sybr)
- h) Perform the following PCR cycles:

| Cycles | Temp             | Time |
|--------|------------------|------|
| 1      | 72°C             | 5:00 |
| 1      | 98°C             | 0:30 |
|        | 98°C             | 0:10 |
|        | 63°C             | 0:30 |
| 99*    | 72°C             | 1:00 |
|        | -- Plate Read -- |      |
|        | 72°C             | 0:10 |

- i) \*Run until majority of wells are exponentially amplifying.

### 4) Library Clean Up and Quantification

- a) Pool 5  $\mu$ L from each well of the PCR plate
- b) Purify using Qiaquick PCR Purification column and elute in 30  $\mu$ L of EB.
- c) Run 2  $\mu$ L of cleaned up pooled library on dsDNA HS qubit.
- d) Use qubit reading to dilute library to ~4 ng/ $\mu$ L and run 1  $\mu$ L on a High Sensitivity Bioanalyzer chip.
- e) Use bioanalyzer concentration results for the range of 200 bp - 1 kb to dilute the pool to 1 nM for sequencing.

### 5) Sequencing

- a) Set up NextSeq run as per manufacturers instructions for a 1 nM sample except for the following changes.
- b) Library pool should be loaded at a concentration of 0.8 pM and a total volume of 1.5 mL.
- c) Custom R1, R2, I1, and I2 primers should be loaded into the appropriate wells at a concentration of 0.6  $\mu$ M.
- d) Nextseq should be operating in standalone mode. Choose the SCISEQ custom chemistry recipe (Amini et. al. 2014). Select dual index. Enter appropriate number of read cycles (50 recommended). And 18 cycles for each index. Select the custom checkbox for all reads and indices.

| Cartridge position | Reagent            | Concentration    | Total Volume (dilute in HT1) | Stock oligo (100 uM) | HT1     |
|--------------------|--------------------|------------------|------------------------------|----------------------|---------|
| 7                  | Custom Read 1      | 0.6 uM           | 1.5 mL                       | 9 µL                 | 1491 µL |
| 8                  | Custom Read 2      | 0.6 uM           | 1.5 mL                       | 9 µL                 | 1491 µL |
| 9                  | Custom Index 1 & 2 | Each 0.6 uM      | 3 mL                         | 18 µL each           | 2964 µL |
| 10                 | Library            | 0.8 pM (<800 bp) | 1.5 mL                       |                      |         |

## Oligo Sequence Tables

**Table 1: Tagmentation Oligos**

| Name                | Sequence (5'->3')                                                      |
|---------------------|------------------------------------------------------------------------|
| Mosaic End Sequence | /5Phos/CTGTCTCTTATACACATCT                                             |
| CPT_TS_i5_1         | TCGTCGGCAGCGTCTCCACGCTATAGCCTGCGATCGAGGACGGCAGATGTGTATAAGAGACAG        |
| CPT_TS_i5_2         | TCGTCGGCAGCGTCTCCACGCATAGAGGCGCGATCGAGGACGGCAGATGTGTATAAGAGACAG        |
| CPT_TS_i5_3         | TCGTCGGCAGCGTCTCCACGCCCTATCCTGCGATCGAGGACGGCAGATGTGTATAAGAGACAG        |
| CPT_TS_i5_4         | TCGTCGGCAGCGTCTCCACGCGGCTCTGAGCGATCGAGGACGGCAGATGTGTATAAGAGACAG        |
| CPT_TS_i5_5         | TCGTCGGCAGCGTCTCCACGCAGGCGAAGGCGATCGAGGACGGCAGATGTGTATAAGAGACAG        |
| CPT_TS_i5_6         | TCGTCGGCAGCGTCTCCACGCTAATCTTAGCGATCGAGGACGGCAGATGTGTATAAGAGACAG        |
| CPT_TS_i5_7         | TCGTCGGCAGCGTCTCCACGCCAGGACGTGCGATCGAGGACGGCAGATGTGTATAAGAGACAG        |
| CPT_TS_i5_8         | TCGTCGGCAGCGTCTCCACGCGTACTGACGCGATCGAGGACGGCAGATGTGTATAAGAGACAG        |
| CPT_TS_i7_1         | GTCTCGTGGGCTCGGCTGTCCCTGTCCCGAGTAATCACCGTCTCCGCCTCAGATGTGTATAAGAGACAG  |
| CPT_TS_i7_2         | GTCTCGTGGGCTCGGCTGTCCCTGTCCCTCTCCGGACACCGTCTCCGCCTCAGATGTGTATAAGAGACAG |
| CPT_TS_i7_3         | GTCTCGTGGGCTCGGCTGTCCCTGTCCAATGAGCGCACCGTCTCCGCCTCAGATGTGTATAAGAGACAG  |
| CPT_TS_i7_4         | GTCTCGTGGGCTCGGCTGTCCCTGTCCGGAATCTCCACCGTCTCCGCCTCAGATGTGTATAAGAGACAG  |
| CPT_TS_i7_5         | GTCTCGTGGGCTCGGCTGTCCCTGTCCCTTCTGAATCACCGTCTCCGCCTCAGATGTGTATAAGAGACAG |
| CPT_TS_i7_6         | GTCTCGTGGGCTCGGCTGTCCCTGTCCACGAATTCACCGTCTCCGCCTCAGATGTGTATAAGAGACAG   |
| CPT_TS_i7_7         | GTCTCGTGGGCTCGGCTGTCCCTGTCCAGTTTACGACCGTCTCCGCCTCAGATGTGTATAAGAGACAG   |
| CPT_TS_i7_8         | GTCTCGTGGGCTCGGCTGTCCCTGTCCGCGCATTACACCGTCTCCGCCTCAGATGTGTATAAGAGACAG  |
| CPT_TS_i7_9         | GTCTCGTGGGCTCGGCTGTCCCTGTCCCATAGCCGCACCGTCTCCGCCTCAGATGTGTATAAGAGACAG  |
| CPT_TS_i7_10        | GTCTCGTGGGCTCGGCTGTCCCTGTCCCTTCCGCGACACCGTCTCCGCCTCAGATGTGTATAAGAGACAG |
| CPT_TS_i7_11        | GTCTCGTGGGCTCGGCTGTCCCTGTCCGCGCGAGACACCGTCTCCGCCTCAGATGTGTATAAGAGACAG  |
| CPT_TS_i7_12        | GTCTCGTGGGCTCGGCTGTCCCTGTCCCTATCGCTCACCGTCTCCGCCTCAGATGTGTATAAGAGACAG  |

**Table 2: PCR Primers**

| Name              | Sequence (5'->3')                                   |
|-------------------|-----------------------------------------------------|
| i7-T119-NEX2cpt-A | CAAGCAGAAGACGGCATAACGAGATaatgccgcttGTCTCGTGGGCTCGG  |
| i7-T120-NEX2cpt-A | CAAGCAGAAGACGGCATAACGAGATtatagacgcaGTCTCGTGGGCTCGG  |
| i7-T121-NEX2cpt-A | CAAGCAGAAGACGGCATAACGAGATtcaatcgcatGTCTCGTGGGCTCGG  |
| i7-T122-NEX2cpt-A | CAAGCAGAAGACGGCATAACGAGATttottaataaGTCTCGTGGGCTCGG  |
| i7-T123-NEX2cpt-A | CAAGCAGAAGACGGCATAACGAGATgtcctagaggGTCTCGTGGGCTCGG  |
| i7-T124-NEX2cpt-A | CAAGCAGAAGACGGCATAACGAGATatattgatacGTCTCGTGGGCTCGG  |
| i7-T125-NEX2cpt-A | CAAGCAGAAGACGGCATAACGAGATccgctgccagGTCTCGTGGGCTCGG  |
| i7-T126-NEX2cpt-A | CAAGCAGAAGACGGCATAACGAGATcctagtacgtGTCTCGTGGGCTCGG  |
| i7-T127-NEX2cpt-A | CAAGCAGAAGACGGCATAACGAGATcaattaccgtGTCTCGTGGGCTCGG  |
| i7-T128-NEX2cpt-A | CAAGCAGAAGACGGCATAACGAGATggccgtagtcGTCTCGTGGGCTCGG  |
| i7-T129-NEX2cpt-A | CAAGCAGAAGACGGCATAACGAGATcgattaccggcGTCTCGTGGGCTCGG |

i7-T130-NEX2cpt-A CAAGCAGAAGACGGCATAACGAGATtaatgaacgaGTCTCGTGGGCTCGG  
i7-T131-NEX2cpt-B CAAGCAGAAGACGGCATAACGAGATccgttccttaGTCTCGTGGGCTCGG  
i7-T132-NEX2cpt-B CAAGCAGAAGACGGCATAACGAGATggtaccatatGTCTCGTGGGCTCGG  
i7-T133-NEX2cpt-B CAAGCAGAAGACGGCATAACGAGATccgattcgcaGTCTCGTGGGCTCGG  
i7-T134-NEX2cpt-B CAAGCAGAAGACGGCATAACGAGATatggctctgcGTCTCGTGGGCTCGG  
i7-T135-NEX2cpt-B CAAGCAGAAGACGGCATAACGAGATgtataatacgtGTCTCGTGGGCTCGG  
i7-T136-NEX2cpt-B CAAGCAGAAGACGGCATAACGAGATatcagcaagtGTCTCGTGGGCTCGG  
i7-T137-NEX2cpt-B CAAGCAGAAGACGGCATAACGAGATggcgaactcgGTCTCGTGGGCTCGG  
i7-T138-NEX2cpt-B CAAGCAGAAGACGGCATAACGAGATttaattgaatGTCTCGTGGGCTCGG  
i7-T139-NEX2cpt-B CAAGCAGAAGACGGCATAACGAGATttaggaccggGTCTCGTGGGCTCGG  
i7-T140-NEX2cpt-B CAAGCAGAAGACGGCATAACGAGATaagtaagagcGTCTCGTGGGCTCGG  
i7-T141-NEX2cpt-B CAAGCAGAAGACGGCATAACGAGATccttggccaGTCTCGTGGGCTCGG  
i7-T142-NEX2cpt-B CAAGCAGAAGACGGCATAACGAGATcatcagaatGTCTCGTGGGCTCGG  
i7-T143-NEX2cpt-C CAAGCAGAAGACGGCATAACGAGATttatagcagaGTCTCGTGGGCTCGG  
i7-T144-NEX2cpt-C CAAGCAGAAGACGGCATAACGAGATttacttggaaGTCTCGTGGGCTCGG  
i7-T145-NEX2cpt-C CAAGCAGAAGACGGCATAACGAGATgctcagccggGTCTCGTGGGCTCGG  
i7-T146-NEX2cpt-C CAAGCAGAAGACGGCATAACGAGATacgtccgcagGTCTCGTGGGCTCGG  
i7-T147-NEX2cpt-C CAAGCAGAAGACGGCATAACGAGATttgactgacgGTCTCGTGGGCTCGG  
i7-T148-NEX2cpt-C CAAGCAGAAGACGGCATAACGAGATttgcgaggcaGTCTCGTGGGCTCGG  
i7-T149-NEX2cpt-C CAAGCAGAAGACGGCATAACGAGATttccaaccgcGTCTCGTGGGCTCGG  
i7-T150-NEX2cpt-C CAAGCAGAAGACGGCATAACGAGATtaacctcggtGTCTCGTGGGCTCGG  
i7-T151-NEX2cpt-C CAAGCAGAAGACGGCATAACGAGATtcaagccgatGTCTCGTGGGCTCGG  
i7-T152-NEX2cpt-C CAAGCAGAAGACGGCATAACGAGATcttgcaacctGTCTCGTGGGCTCGG  
i7-T153-NEX2cpt-C CAAGCAGAAGACGGCATAACGAGATccatcgcgaaGTCTCGTGGGCTCGG  
i7-T154-NEX2cpt-C CAAGCAGAAGACGGCATAACGAGATtagacttcttGTCTCGTGGGCTCGG  
i7-T231-NEX2cpt-D CAAGCAGAAGACGGCATAACGAGATtgcgcgatgcGTCTCGTGGGCTCGG  
i7-T232-NEX2cpt-D CAAGCAGAAGACGGCATAACGAGATattgagattGTCTCGTGGGCTCGG  
i7-T233-NEX2cpt-D CAAGCAGAAGACGGCATAACGAGATttgatattGTCTCGTGGGCTCGG  
i7-T234-NEX2cpt-D CAAGCAGAAGACGGCATAACGAGATcggtaggaatGTCTCGTGGGCTCGG  
i7-T235-NEX2cpt-D CAAGCAGAAGACGGCATAACGAGATaccagcgcagGTCTCGTGGGCTCGG  
i7-T236-NEX2cpt-D CAAGCAGAAGACGGCATAACGAGATcgaatgagctGTCTCGTGGGCTCGG  
i7-T237-NEX2cpt-D CAAGCAGAAGACGGCATAACGAGATagttcgagtaGTCTCGTGGGCTCGG  
i7-T238-NEX2cpt-D CAAGCAGAAGACGGCATAACGAGATttggacgctgGTCTCGTGGGCTCGG  
i7-T239-NEX2cpt-D CAAGCAGAAGACGGCATAACGAGATatagactaggGTCTCGTGGGCTCGG  
i7-T240-NEX2cpt-D CAAGCAGAAGACGGCATAACGAGATtatagtaagcGTCTCGTGGGCTCGG  
i7-T241-NEX2cpt-D CAAGCAGAAGACGGCATAACGAGATcggtcgtaaGTCTCGTGGGCTCGG  
i7-T242-NEX2cpt-D CAAGCAGAAGACGGCATAACGAGATatggcggatcGTCTCGTGGGCTCGG  
i7-T243-NEX2cpt-E CAAGCAGAAGACGGCATAACGAGATctctgatcagGTCTCGTGGGCTCGG  
i7-T244-NEX2cpt-E CAAGCAGAAGACGGCATAACGAGATggccagtcggGTCTCGTGGGCTCGG  
i7-T245-NEX2cpt-E CAAGCAGAAGACGGCATAACGAGATcggaagatatGTCTCGTGGGCTCGG  
i7-T246-NEX2cpt-E CAAGCAGAAGACGGCATAACGAGATtggctgatgaGTCTCGTGGGCTCGG  
i7-T247-NEX2cpt-E CAAGCAGAAGACGGCATAACGAGATgaaggttgccGTCTCGTGGGCTCGG  
i7-T248-NEX2cpt-E CAAGCAGAAGACGGCATAACGAGATgttgaaggatGTCTCGTGGGCTCGG  
i7-T249-NEX2cpt-E CAAGCAGAAGACGGCATAACGAGATccattcgtaaGTCTCGTGGGCTCGG  
i7-T250-NEX2cpt-E CAAGCAGAAGACGGCATAACGAGATtgcgccagaaGTCTCGTGGGCTCGG  
i7-T251-NEX2cpt-E CAAGCAGAAGACGGCATAACGAGATcgaataattcGTCTCGTGGGCTCGG



i7-T252-NEX2cpt-E CAAGCAGAAGACGGCATAACGAGATgcgacgccttGTCTCGTGGGCTCGG  
i7-T253-NEX2cpt-E CAAGCAGAAGACGGCATAACGAGATatcaacgattGTCTCGTGGGCTCGG  
i7-T254-NEX2cpt-E CAAGCAGAAGACGGCATAACGAGATgttctgaattGTCTCGTGGGCTCGG  
i7-T255-NEX2cpt-F CAAGCAGAAGACGGCATAACGAGATgctaacctcaGTCTCGTGGGCTCGG  
i7-T256-NEX2cpt-F CAAGCAGAAGACGGCATAACGAGATcaagcaactgGTCTCGTGGGCTCGG  
i7-T257-NEX2cpt-F CAAGCAGAAGACGGCATAACGAGATggagcggccgGTCTCGTGGGCTCGG  
i7-T258-NEX2cpt-F CAAGCAGAAGACGGCATAACGAGATcgcgtagcgtGTCTCGTGGGCTCGG  
i7-T259-NEX2cpt-F CAAGCAGAAGACGGCATAACGAGATcgatggcgccGTCTCGTGGGCTCGG  
i7-T260-NEX2cpt-F CAAGCAGAAGACGGCATAACGAGATtggtattcatGTCTCGTGGGCTCGG  
i7-T261-NEX2cpt-F CAAGCAGAAGACGGCATAACGAGATgataaggcaaGTCTCGTGGGCTCGG  
i7-T262-NEX2cpt-F CAAGCAGAAGACGGCATAACGAGATgccggctgagGTCTCGTGGGCTCGG  
i7-T263-NEX2cpt-F CAAGCAGAAGACGGCATAACGAGATtgcgccatctGTCTCGTGGGCTCGG  
i7-T264-NEX2cpt-F CAAGCAGAAGACGGCATAACGAGATaagtctccgGTCTCGTGGGCTCGG  
i7-T265-NEX2cpt-F CAAGCAGAAGACGGCATAACGAGATagactcaagcGTCTCGTGGGCTCGG  
i7-T266-NEX2cpt-F CAAGCAGAAGACGGCATAACGAGATgcaggcgacgGTCTCGTGGGCTCGG  
i5-T155-NEX1cpt-A AATGATACGGCGACCACCGAGATCTACACgtccttaagaTCGTCCGGCAGCGTC  
i5-T156-NEX1cpt-A AATGATACGGCGACCACCGAGATCTACACagtaacggctTCGTCCGGCAGCGTC  
i5-T157-NEX1cpt-A AATGATACGGCGACCACCGAGATCTACACgttcgtcagaTCGTCCGGCAGCGTC  
i5-T158-NEX1cpt-A AATGATACGGCGACCACCGAGATCTACACcgcctaataTCGTCCGGCAGCGTC  
i5-T159-NEX1cpt-A AATGATACGGCGACCACCGAGATCTACACaccggaattaTCGTCCGGCAGCGTC  
i5-T160-NEX1cpt-A AATGATACGGCGACCACCGAGATCTACACtaggccatagTCGTCCGGCAGCGTC  
i5-T161-NEX1cpt-A AATGATACGGCGACCACCGAGATCTACACtaactcttagTCGTCCGGCAGCGTC  
i5-T162-NEX1cpt-A AATGATACGGCGACCACCGAGATCTACACtatgagttaaTCGTCCGGCAGCGTC  
i5-T163-NEX1cpt-B AATGATACGGCGACCACCGAGATCTACACtatcatgatTCGTCCGGCAGCGTC  
i5-T164-NEX1cpt-B AATGATACGGCGACCACCGAGATCTACACgagcatatggTCGTCCGGCAGCGTC  
i5-T165-NEX1cpt-B AATGATACGGCGACCACCGAGATCTACACtaacgatccaTCGTCCGGCAGCGTC  
i5-T166-NEX1cpt-B AATGATACGGCGACCACCGAGATCTACACcggcgtaactTCGTCCGGCAGCGTC  
i5-T167-NEX1cpt-B AATGATACGGCGACCACCGAGATCTACACcgtcgcagccTCGTCCGGCAGCGTC  
i5-T168-NEX1cpt-B AATGATACGGCGACCACCGAGATCTACACgtagtccatTCGTCCGGCAGCGTC  
i5-T169-NEX1cpt-B AATGATACGGCGACCACCGAGATCTACACttgccttggcTCGTCCGGCAGCGTC  
i5-T170-NEX1cpt-B AATGATACGGCGACCACCGAGATCTACACtgctaattctTCGTCCGGCAGCGTC  
i5-T171-NEX1cpt-C AATGATACGGCGACCACCGAGATCTACACgtcctacttgTCGTCCGGCAGCGTC  
i5-T172-NEX1cpt-C AATGATACGGCGACCACCGAGATCTACACggtaggtagTCGTCCGGCAGCGTC  
i5-T173-NEX1cpt-C AATGATACGGCGACCACCGAGATCTACACgagcatcattTCGTCCGGCAGCGTC  
i5-T174-NEX1cpt-C AATGATACGGCGACCACCGAGATCTACACccgctccggcTCGTCCGGCAGCGTC  
i5-T175-NEX1cpt-C AATGATACGGCGACCACCGAGATCTACACttcttccggTCGTCCGGCAGCGTC  
i5-T176-NEX1cpt-C AATGATACGGCGACCACCGAGATCTACACaggagagaacTCGTCCGGCAGCGTC  
i5-T177-NEX1cpt-C AATGATACGGCGACCACCGAGATCTACACtaactcaattTCGTCCGGCAGCGTC  
i5-T178-NEX1cpt-C AATGATACGGCGACCACCGAGATCTACACactataggtTCGTCCGGCAGCGTC  
i5-T207-NEX1cpt-D AATGATACGGCGACCACCGAGATCTACACtaacgaattgTCGTCCGGCAGCGTC  
i5-T208-NEX1cpt-D AATGATACGGCGACCACCGAGATCTACACtgagaaccaaTCGTCCGGCAGCGTC  
i5-T209-NEX1cpt-D AATGATACGGCGACCACCGAGATCTACACttattctgagTCGTCCGGCAGCGTC  
i5-T210-NEX1cpt-D AATGATACGGCGACCACCGAGATCTACACttattatggTCGTCCGGCAGCGTC  
i5-T211-NEX1cpt-D AATGATACGGCGACCACCGAGATCTACACatagagccaTCGTCCGGCAGCGTC  
i5-T212-NEX1cpt-D AATGATACGGCGACCACCGAGATCTACACcaaccagtaTCGTCCGGCAGCGTC  
i5-T213-NEX1cpt-D AATGATACGGCGACCACCGAGATCTACACcatccgactaTCGTCCGGCAGCGTC

|                   |                                                         |
|-------------------|---------------------------------------------------------|
| i5-T214-NEX1cpt-D | AATGATACGGCGACCACCGAGATCTACACatcatggctgTCGTCCGGCAGCGTC  |
| i5-T215-NEX1cpt-E | AATGATACGGCGACCACCGAGATCTACACcccgcaagttcTCGTCCGGCAGCGTC |
| i5-T216-NEX1cpt-E | AATGATACGGCGACCACCGAGATCTACACcttctcattgTCGTCCGGCAGCGTC  |
| i5-T217-NEX1cpt-E | AATGATACGGCGACCACCGAGATCTACACcaggaggagaTCGTCCGGCAGCGTC  |
| i5-T218-NEX1cpt-E | AATGATACGGCGACCACCGAGATCTACACgatacggcgTCGTCCGGCAGCGTC   |
| i5-T219-NEX1cpt-E | AATGATACGGCGACCACCGAGATCTACACccagtcctctTCGTCCGGCAGCGTC  |
| i5-T220-NEX1cpt-E | AATGATACGGCGACCACCGAGATCTACACcatagttcggTCGTCCGGCAGCGTC  |
| i5-T221-NEX1cpt-E | AATGATACGGCGACCACCGAGATCTACACcgtaatcgagTCGTCCGGCAGCGTC  |
| i5-T222-NEX1cpt-E | AATGATACGGCGACCACCGAGATCTACACccggttcggatTCGTCCGGCAGCGTC |
| i5-T223-NEX1cpt-F | AATGATACGGCGACCACCGAGATCTACACccataagtccTCGTCCGGCAGCGTC  |
| i5-T224-NEX1cpt-F | AATGATACGGCGACCACCGAGATCTACACggcaatgagaTCGTCCGGCAGCGTC  |
| i5-T225-NEX1cpt-F | AATGATACGGCGACCACCGAGATCTACACcggttatgccTCGTCCGGCAGCGTC  |
| i5-T226-NEX1cpt-F | AATGATACGGCGACCACCGAGATCTACACTggccggcctTCGTCCGGCAGCGTC  |
| i5-T227-NEX1cpt-F | AATGATACGGCGACCACCGAGATCTACACagctgcaataTCGTCCGGCAGCGTC  |
| i5-T228-NEX1cpt-F | AATGATACGGCGACCACCGAGATCTACACTggccatgcaTCGTCCGGCAGCGTC  |
| i5-T229-NEX1cpt-F | AATGATACGGCGACCACCGAGATCTACACTgacgctccgTCGTCCGGCAGCGTC  |
| i5-T230-NEX1cpt-F | AATGATACGGCGACCACCGAGATCTACACaactgctgccTCGTCCGGCAGCGTC  |

**Table 3: Sequencing Primers**

| <b>Name</b>               | <b>Sequence (5'-&gt;3')</b>        |
|---------------------------|------------------------------------|
| Read 1 sequencing primer  | GCGATCGAGGACGGCAGATGTGTATAAGAGACAG |
| Read 2 sequencing primer  | CACCGTCTCCGCCTCAGATGTGTATAAGAGACAG |
| Index 1 sequencing primer | CTGTCTCTTATACACATCTGAGGCGGAGACGGTG |
| Index 2 sequencing primer | CTGTCTCTTATACACATCTGCCGTCTCGATCGC  |
