# Supplementary material
Source: PubMed Central journal article supplement (PMC5908213)
Supplement: NIHMS956855-supplement-SUPPLEMENTARY_INFORMATION.pdf [file NIHMS956855-supplement-SUPPLEMENTARY_INFORMATION.pdf]

# Sequencing thousands of single-cell genomes with combinatorial indexing

Sarah A. Vitak\*, Kristof A. Torkenczy\*, Jimi L. Rosenkrantz, Andrew J. Fields, Lena Christiansen, Melissa H. Wong, Lucia Carbone, Frank J. Steemers, and Andrew Adey

## Supplementary Tables

|                                                  |     |
|--------------------------------------------------|-----|
| S1   Bulk Library Statistics .....               | 3   |
| S2   SCI-seq library summary .....               | 3-4 |
| S3   SCI-seq library projection statistics ..... | 5   |

## Supplementary Figures

|                                                                                                                                           |       |
|-------------------------------------------------------------------------------------------------------------------------------------------|-------|
| S1   Fluorescence Activated Nuclei Sorting (FANS) .....                                                                                   | 6     |
| S2   SCI-seq library complexity and index read count distributions for all preparations .....                                             | 7-9   |
| S3   SCI-seq single cell determination using a mixed model .....                                                                          | 10    |
| S4   SCI-seq on a mix of human and mouse cells .....                                                                                      | 11    |
| S5   SCI-seq library complexity and index read count distributions after deeper sequencing .....                                          | 12    |
| S6   9bp read overlaps observed from sequencing adjacent transposition events in the same single cell .....                               | 13    |
| S7   Copy number calling computational workflow for HMM and CBS .....                                                                     | 14    |
| S8   CNV assessment using standard methods of single cell sequencing on GM12878 .....                                                     | 15    |
| S9   Variance by window size and read count cutoff across all methods .....                                                               | 16-17 |
| S10   GM12878 aneuploidy rates across variance score cutoffs .....                                                                        | 18-19 |
| S11   CNV profiles for Rhesus frontal cortex, Individual 1 using quasi-random priming (QRP) .....                                         | 20    |
| S12   CNV profiles for Rhesus frontal cortex, Individual 1 using degenerate oligonucleotide primed PCR (DOP) .....                        | 21    |
| S13   CNV profiles for Rhesus frontal cortex, Individual 1 using SCI-seq with LAND nucleosome depletion .....                             | 22    |
| S14   CNV profiles for Rhesus frontal cortex, Individual 1 using SCI-seq with xSDS nucleosome depletion .....                             | 23    |
| S15   Comparison of coverage uniformity for Rhesus frontal cortex individual 1 .....                                                      | 24    |
| S16   Rhesus aneuploidy rates across variance score cutoffs .....                                                                         | 25-26 |
| S17   CNV profiles for Rhesus frontal cortex, Individual 2 using SCI-seq with xSDS nucleosome depletion .....                             | 27    |
| S18   SCI-seq using xSDS-based nucleosome depletion on pancreatic ductal adenocarcinoma .....                                             | 28-29 |
| S19   Single cell CNV calls on primary PDAC using xSDS SCI-seq .....                                                                      | 29    |
| S20   Schematic of breakpoint analysis workflow .....                                                                                     | 30    |
| S21   SCI-seq using LAND-based nucleosome depletion on HeLa S3 using the Hidden Markov Model method for copy number variant calling ..... | 31    |

|                                                                                                                                                       |    |
|-------------------------------------------------------------------------------------------------------------------------------------------------------|----|
| S22   SCI-seq using LAND-based nucleosome depletion on HeLa S3 copy number variant calling in single cells using the Hidden Markov Model method ..... | 31 |
| S23   Breakpoint analysis of HeLa .....                                                                                                               | 32 |
| S24   PCA on HeLa breakpoint windows .....                                                                                                            | 33 |
| S25   SCI-seq using xSDS-based nucleosome depletion on a banked colorectal cancer sample .....                                                        | 33 |

| Bulk Library | Duplication Rate | Reads MQ $\geq$ 10 | Reads in HeLa DHS sites | Percent in DHS sites | Fold Enrichment | Estimated Library Size |
|--------------|------------------|--------------------|-------------------------|----------------------|-----------------|------------------------|
| xSDS         | 4.50%            | 83,507,827         | 2,307,825               | 2.76%                | 2.22            | 798,085,544            |
| LAND         | 1.86%            | 64,353,617         | 2,240,466               | 3.48%                | 2.79            | 1,657,844,868          |
| ATAC         | 27.24%           | 60,494,125         | 8,179,083               | 13.52%               | 10.84           | 170,409,197            |
| SHOT*        | NA               | 60,000,000         | 1,031,310               | 1.72%                | 1.38            | NA                     |

**Supplementary Table 1 | Bulk library statistics.** Information on bulk cell libraries constructed to evaluate nucleosome depletion. \*SHOT library is a random sampling of 60M reads obtained from the HeLa dbGaP repository under accession: phs000640.v4.p1 (ref. 19). Library size estimates were generated using Picard tools function “EstimateLibraryComplexity”. For shotgun sequencing, the read used were duplicate removed, and therefore duplication rate and library size estimates were not determined.

a.

| Library         | Sample                                           | Nucleosome Depletion Method           | PCR Wells | Nuc. / well | EM Mixed Model                 |                            |          |
|-----------------|--------------------------------------------------|---------------------------------------|-----------|-------------|--------------------------------|----------------------------|----------|
|                 |                                                  |                                       |           |             | $\lambda$ (noise, single cell) | $\mu$ (noise, single cell) | $\sigma$ |
| GM12878.LAND1   | Human (GM12878)                                  | LAND (27.6 $\mu$ M LIS)               | 96        | 25          | 0.872007,0.127993              | 1.080594,3.841161          | 0.66137  |
| GM12878.LAND2   | Human (GM12878)                                  | LAND (13.8 $\mu$ M LIS)               | 96        | 25          | 0.419749,0.580251              | 0.291373,1.982663          | 0.513341 |
| GM12878.NSTLAND | Human (GM12878)                                  | LAND (13.8 $\mu$ M LIS + 200 mM NaCl) | 96        | 22          | 0.752279,0.247721              | 1.177030,3.937951          | 0.736942 |
| GM12878.xLAND   | Human (GM12878)                                  | x-link + LAND (13.8 $\mu$ M LIS)      | 96        | 22          | 0.803801,0.196199              | 0.814446,3.409897          | 0.578019 |
| GM12878.LAND3   | Human (GM12878)                                  | LAND (13.8 $\mu$ M LIS)               | 96        | 22          | 0.842110,0.157890              | 1.307204,4.047124          | 0.680607 |
| GM12878.LAND4   | Human (GM12878)                                  | LAND (4.6 $\mu$ M LIS)                | 96        | 22          | 0.861427,0.138573              | 1.184529,3.689950          | 0.619864 |
| GM12878.arrLAND | Human (GM12878)                                  | Arrested, LAND (4.6 $\mu$ M LIS)      | 96        | 22          | 0.970847,0.0291532             | 1.280424,4.3764043         | 0.526405 |
| HeLa.LAND1      | Human (HeLa S3)                                  | LAND (4.6 $\mu$ M LIS)                | 96        | 22          | 0.884456,0.115544              | 1.489698,4.622590          | 0.740663 |
| HeLa.LAND2      | Human (HeLa S3)                                  | LAND (4.6 $\mu$ M LIS)                | 96        | 22          | 0.849262,0.150738              | 0.816437,3.448150          | 0.496199 |
| HeLa.LAND3      | Human (HeLa S3)                                  | LAND (4.6 $\mu$ M LIS)                | 96        | 22          | 0.838170,0.161830              | 1.476571,4.135318          | 0.539156 |
| HumMus.LAND1    | Human (HeLa S3), Mouse (3T3)                     | LAND (27.6 $\mu$ M LIS)               | 96        | 25          | 0.816623,0.183377              | 0.826636,2.662703          | 0.559918 |
| HumMus.LAND2    | Human (HeLa S3), Mouse (3T3)                     | LAND (113.8 $\mu$ M LIS)              | 96        | 25          | 0.784437,0.215563              | 1.223024,3.960925          | 0.716764 |
| HumMus.LAND3    | Human (GM12878), Mouse (3T3)                     | LAND (4.6 $\mu$ M LIS)                | 96        | 22          | 0.863399,0.136601              | 1.473206,4.590961          | 0.627049 |
| HumMus.LAND4    | Human (GM12878), Mouse (3T3)                     | LAND (4.6 $\mu$ M LIS)                | 96        | 22          | 0.973846,0.0261538             | 1.448882,5.0360715         | 0.712699 |
| RhesusInd1.LAND | Rhesus Individual 1 (frozen)                     | LAND (4.6 $\mu$ M LIS)                | 16        | 22          | 0.823777,0.176223              | 1.774362,4.301835          | 1.09558  |
| GM12878.xSDS    | Human (GM12878)                                  | xSDS                                  | 288       | 22          | 0.871926,0.128074              | 1.781897,4.291739          | 0.764169 |
| HumMus.xSDS     | Human (HeLa S3), Mouse (3T3)                     | xSDS                                  | 96        | 22          | 0.868349,0.131651              | 1.776006,4.209856          | 0.878084 |
| CRC.xSDS        | Stage 2 Colorectal Cancer (frozen)               | xSDS                                  | 16        | 22          | 0.911423,0.0885767             | 1.423343,4.7335258         | 0.83885  |
| PDAC.xSDS       | Stage 3 Pancreatic Ductal Adenocarcinoma (fresh) | xSDS                                  | 288       | 22          | 0.915855,0.0841453             | 1.713041,4.4984682         | 0.872799 |
| RhesusInd1.xSDS | Rhesus Individual 1 (frozen)                     | xSDS                                  | 96        | 22          | 0.953348,0.0466516             | 1.122175,4.4798411         | 0.788582 |
| RhesusInd2.xSDS | Rhesus Individual 2 (frozen)                     | xSDS                                  | 96        | 22          | 0.931090,0.0689105             | 1.091425,4.5055530         | 0.763775 |

b.

## Sequenced Reads

| Library         | Single Cell<br>Read Cutoff | Single Cell<br>Libraries | Median Unique<br>MQ $\geq$ 10 Reads | Mean Unique<br>MQ $\geq$ 10 Reads | Median<br>Complexity | Cells $\geq$ 5e4<br>Reads |
|-----------------|----------------------------|--------------------------|-------------------------------------|-----------------------------------|----------------------|---------------------------|
| GM12878.LAND1   | 1,512                      | 621                      | 11,721                              | 37,055                            | 45.96                | 129                       |
| GM12878.LAND2   | 1,000                      | 113                      | 2,091                               | 3,434                             | 90.79                | 0                         |
| GM12878.NSTLAND | 1,588                      | 1,060                    | 13,734                              | 52,244                            | 71.33                | 313                       |
| GM12878.xLAND   | 1,000                      | 1,212                    | 6,384                               | 14,148                            | 58.80                | 72                        |
| GM12878.LAND3   | 2,325                      | 1,015                    | 16,673                              | 84,010                            | 34.42                | 232                       |
| GM12878.LAND4   | 1,529                      | 616                      | 7,151                               | 32,614                            | 87.55                | 68                        |
| GM12878.arrLAND | 7,079                      | 119                      | 33,923                              | 94,036                            | 36.51                | 54                        |
| HeLa.LAND1      | 7,619                      | 573                      | 67,077                              | 100,016                           | 91.01                | 338                       |
| HeLa.LAND2      | 1,000                      | 648                      | 4,756                               | 18,026                            | 37.45                | 29                        |
| HeLa.LAND3      | 3,946                      | 1,140                    | 18,695                              | 25,501                            | 97.73                | 120                       |
| HumMus.LAND1    | 1,000                      | 263                      | 2,699                               | 6,174                             | 2.90                 | 4                         |
| HumMus.LAND2    | 1,754                      | 1,346                    | 13,876                              | 51,952                            | 71.31                | 388                       |
| HumMus.LAND3    | 9,202                      | 645                      | 61,408                              | 74,329                            | 96.69                | 378                       |
| HumMus.LAND4    | 21,055                     | 115                      | 119,428                             | 359,175                           | 95.84                | 99                        |
| RhesusInd1.LAND | 5,947                      | 340                      | 141,449                             | 165,453                           | 88.21                | 248                       |
| GM12878.xSDS    | 6,051                      | 3,123                    | 29,550                              | 64,986                            | 53.08                | 1,056                     |
| HumMus.xSDS     | 5,970                      | 1,331                    | 44,699                              | 64,659                            | 87.89                | 605                       |
| CRC.xSDS        | 7,846                      | 151                      | 72,753                              | 110,823                           | 89.70                | 111                       |
| PDAC.xSDS       | 5,164                      | 1,715                    | 49,272                              | 86,592                            | 68.60                | 846                       |
| RhesusInd1.xSDS | 4,912                      | 171                      | 55,142                              | 120,769                           | 24.36                | 92                        |
| RhesusInd2.xSDS | 5,517                      | 381                      | 62,731                              | 122,602                           | 23.76                | 213                       |
|                 |                            | <b>16,698</b>            |                                     |                                   |                      | <b>5,395</b>              |

**Supplementary Table 2 | SCI-seq library summary.** Information on library construction and statistics on the actual depth obtained for each SCI-seq library preparation. (a) Details of library construction and the mixed model used to determine the read count threshold for single cell libraries. (b) Details on libraries for the actual sequence depth obtained in this study.

a.

## Library Projections

| Library         | Projected to Median of 50% Complexity |            |               | Projected to Median of 25% Complexity |            |                | Projected to Median of 10% Complexity |            |                |
|-----------------|---------------------------------------|------------|---------------|---------------------------------------|------------|----------------|---------------------------------------|------------|----------------|
|                 | Median                                | Mean       | Raw Reads     | Median                                | Mean       | Raw Reads      | Median                                | Mean       | Raw Reads      |
| GM12878.LAND1   | 378,305                               | 1,176,230  | 1,640,000,000 | 554,638                               | 1,734,782  | 4,850,000,000  | 653,064                               | 2,115,189  | 14,120,000,000 |
| GM12878.NSTLAND | 44,608                                | 155,477    | 350,000,000   | 68,418                                | 228,101    | 1,030,000,000  | 83,359                                | 269,951    | 2,980,000,000  |
| GM12878.LAND3   | 218,132                               | 1,318,212  | 2,430,000,000 | 323,878                               | 2,133,376  | 7,220,000,000  | 399,607                               | 2,718,203  | 21,050,000,000 |
| GM12878.LAND4   | 135,114                               | 746,530    | 810,000,000   | 200,422                               | 1,239,687  | 2,390,000,000  | 246,204                               | 2,082,902  | 6,940,000,000  |
| GM12878.arrLAND | 1,490,817                             | 3,684,539  | 910,000,000   | 2,141,086                             | 5,687,397  | 2,710,000,000  | 2,792,344                             | 7,024,499  | 7,900,000,000  |
| HeLa.LAND1      | 3,997,311                             | 5,642,469  | 7,180,000,000 | 6,140,962                             | 8,861,587  | 21,380,000,000 | 7,399,793                             | 11,190,892 | 62,310,000,000 |
| HeLa.LAND3      | 736,813                               | 901,740    | 2,350,000,000 | 1,107,204                             | 1,415,747  | 6,970,000,000  | 1,337,941                             | 1,806,880  | 20,320,000,000 |
| HumMus.LAND1    | 35,991                                | 79,857     | 50,000,000    | 56,355                                | 126,673    | 150,000,000    | 70,808                                | 161,428    | 420,000,000    |
| HumMus.LAND2    | 44,393                                | 154,148    | 440,000,000   | 67,957                                | 226,139    | 1,290,000,000  | 82,696                                | 277,161    | 3,760,000,000  |
| HumMus.LAND3    | 2,257,543                             | 2,638,358  | 3,890,000,000 | 3,453,346                             | 3,957,131  | 11,600,000,000 | 4,186,331                             | 4,806,388  | 33,740,000,000 |
| HumMus.LAND4    | 4,305,319                             | 11,479,621 | 3,260,000,000 | 6,126,707                             | 16,880,151 | 9,710,000,000  | 7,474,417                             | 20,732,681 | 28,290,000,000 |
| RhesusInd1.LAND | 454,681                               | 514,445    | 530,000,000   | 685,354                               | 756,326    | 1,570,000,000  | 823,686                               | 902,566    | 4,570,000,000  |
| GM12878.xSDS    | 26,791                                | 63,223     | 580,000,000   | 39,666                                | 94,153     | 1,710,000,000  | 48,089                                | 113,352    | 4,980,000,000  |
| CRC.xSDS        | 352,168                               | 530,978    | 190,000,000   | 532,772                               | 790,798    | 560,000,000    | 641,639                               | 946,770    | 1,620,000,000  |
| PDAC.xSDS       | 71,378                                | 129,304    | 590,000,000   | 107,615                               | 191,011    | 1,750,000,000  | 130,444                               | 228,852    | 5,110,000,000  |

b.

## Number of Cells That Can Reach N Reads from Projections

| Library         | 5.00E+04 | 1.00E+05 | 1.50E+05 | 2.50E+05 | 5.00E+05 | 7.50E+05 | 1.00E+06 |
|-----------------|----------|----------|----------|----------|----------|----------|----------|
| GM12878.LAND1   | 619      | 604      | 579      | 504      | 373      | 308      | 268      |
| GM12878.NSTLAND | 662      | 504      | 439      | 340      | 183      | 112      | 78       |
| GM12878.LAND3   | 990      | 886      | 810      | 674      | 470      | 370      | 310      |
| GM12878.LAND4   | 574      | 474      | 403      | 319      | 211      | 167      | 137      |
| GM12878.arrLAND | 119      | 119      | 118      | 117      | 115      | 107      | 102      |
| HeLa.LAND1      | 573      | 573      | 573      | 572      | 557      | 547      | 541      |
| HeLa.LAND3      | 1,140    | 1,138    | 1,129    | 1,115    | 1,057    | 941      | 812      |
| HumMus.LAND1    | 167      | 113      | 76       | 40       | 19       | 11       | 6        |
| HumMus.LAND2    | 851      | 636      | 550      | 421      | 228      | 137      | 100      |
| HumMus.LAND3    | 645      | 645      | 645      | 641      | 634      | 610      | 593      |
| HumMus.LAND4    | 115      | 115      | 115      | 115      | 115      | 115      | 115      |
| RhesusInd1.LAND | 328      | 299      | 277      | 260      | 219      | 186      | 148      |
| GM12878.xSDS    | 1,804    | 1,094    | 769      | 468      | 183      | 69       | 22       |
| CRC.xSDS        | 151      | 147      | 144      | 137      | 107      | 70       | 43       |
| PDAC.xSDS       | 1,356    | 1,080    | 874      | 601      | 242      | 98       | 54       |

**Supplementary Table 3 | SCI-seq library projection statistics.** Information on projected statistics of each SCI-seq library if increased sequencing depth were obtained. Projections use the model described in the methods section. Libraries that either failed (GM12878.LAND2 and HeLa.LAND2), or were sequenced to saturation for which the projections do not apply (Rhesus.Ind1.xSDS and Rhesus.Ind2.xSDS) are not included. (a) Projections out to a given median complexity including the raw read count to reach that point. (b) The number of single cells meeting various read count thresholds are listed if libraries were sequenced to saturation (median complexity of 5%).

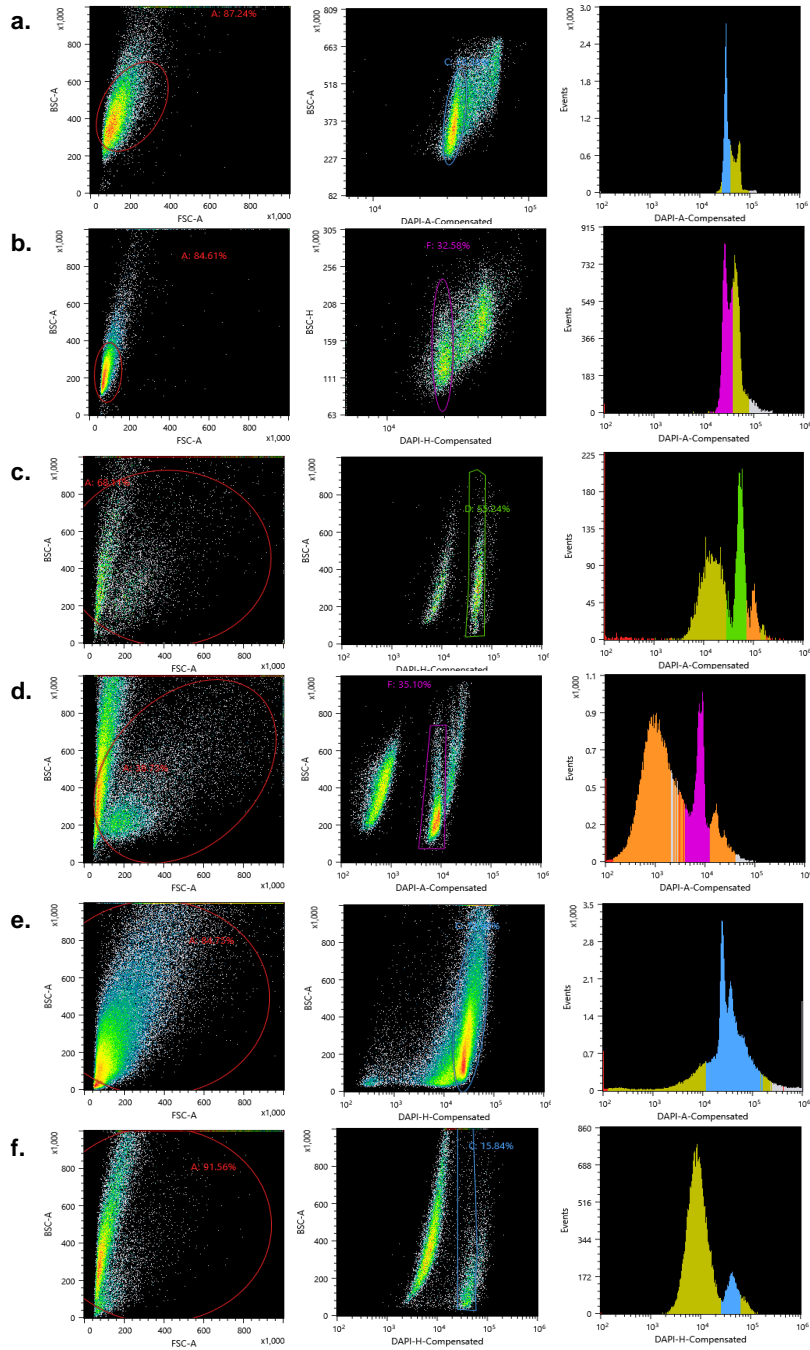

**Supplementary Figure 1 | Fluorescence Activated Nuclei Sorting (FANS).** Representative plots from FANS sorting of single nuclei. All plots are from sorting the second (PCR) plate unless noted otherwise. (a) ATAC-seq Nuclei (b) LAND (c) HeLa S3 and 3T3 (d) xSDS (e) PDAC Sort 1 Transposase Plate (f) PDAC Sort 2 PCR plate.

GM12878.LAND1

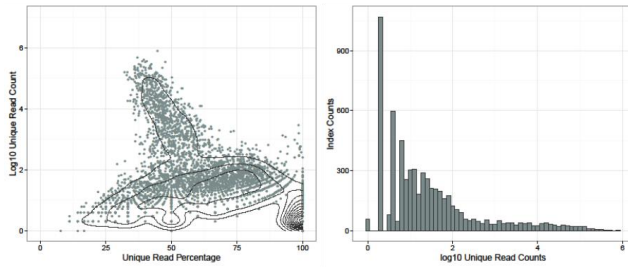

GM12878.LAND2 (failed library)

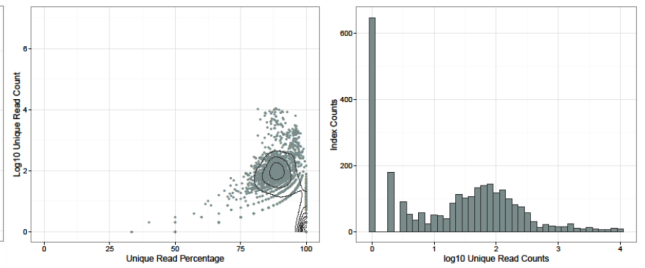

GM12878.LAND3

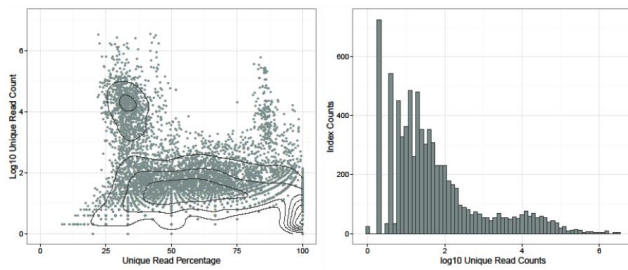

GM12878.LAND4

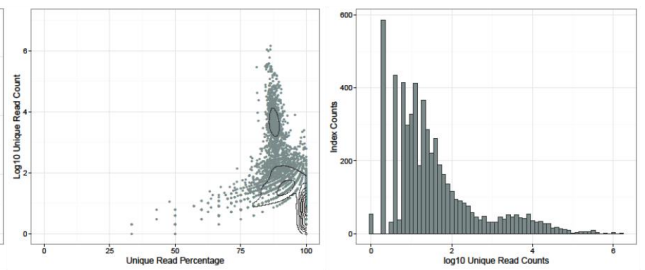

GM12878.NSTLAND

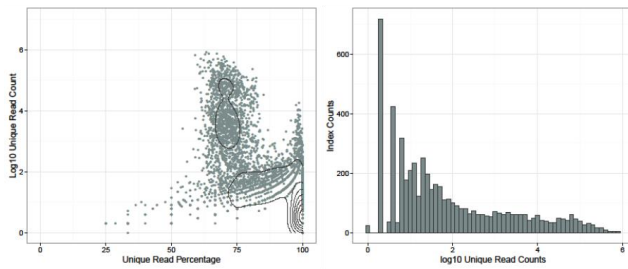

GM12878.xLAND

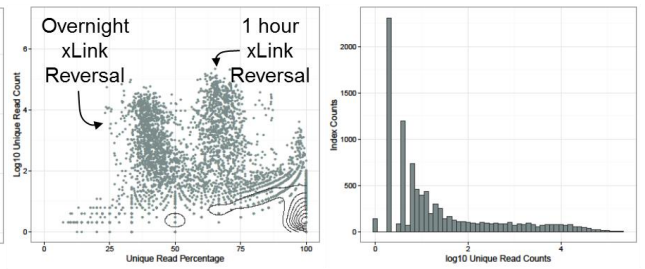

GM12878.arrestLAND

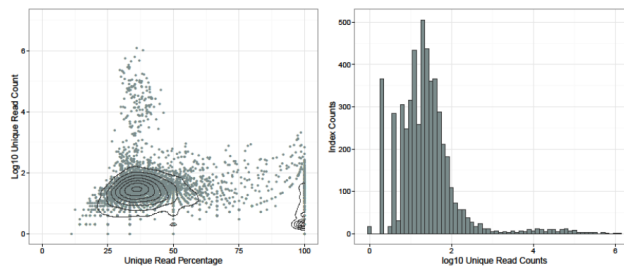

HeLa.LAND1

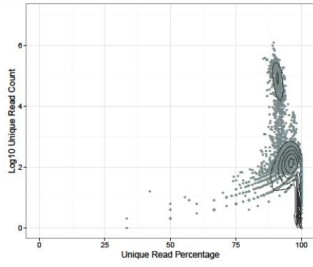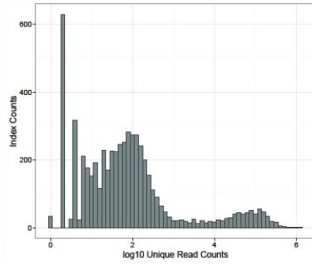

HeLa.LAND2

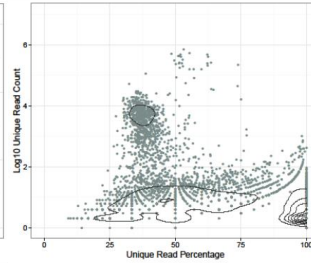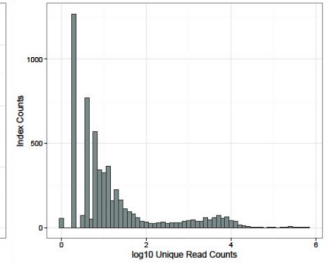

HeLa.LAND3

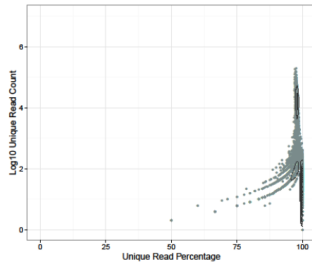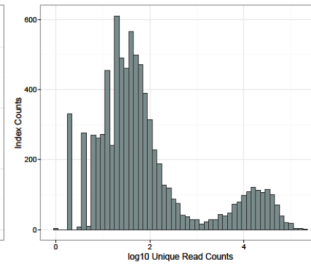

HumMus.LAND1 (failed library)

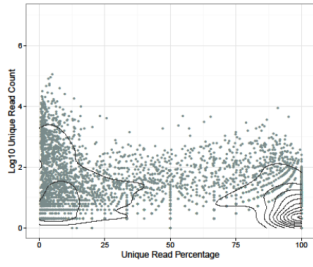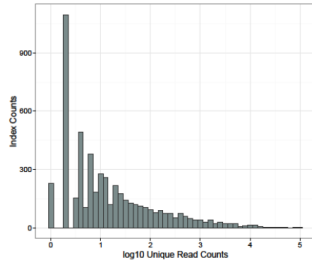

HumMus.LAND2

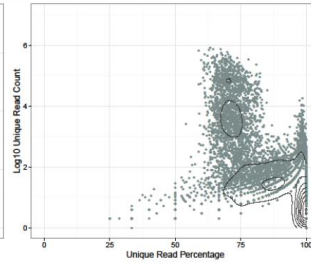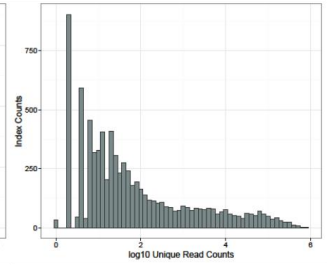

HumMus.LAND3

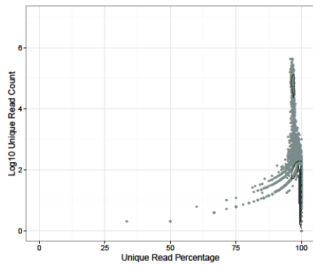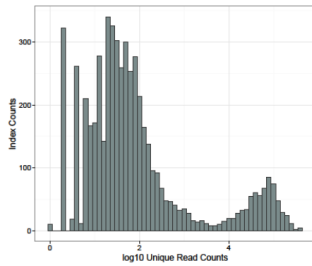

HumMus.LAND4

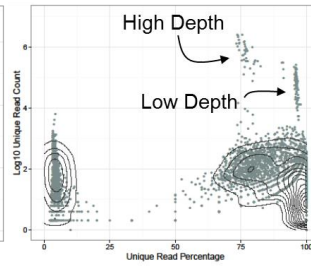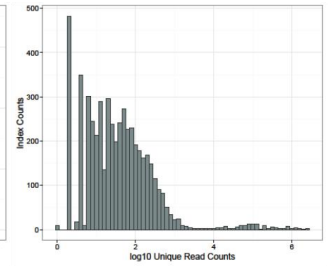



GM12878.xSDS

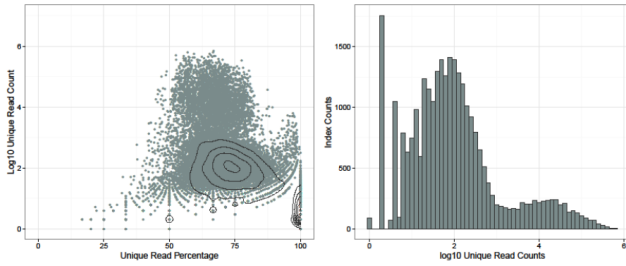

HumMus.xSDS

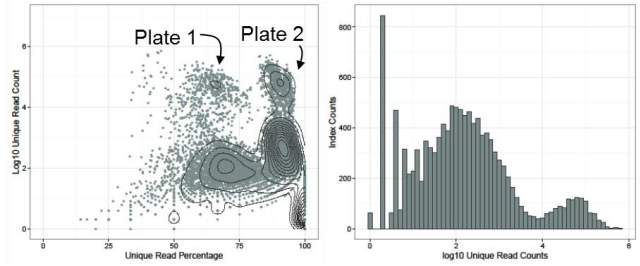

RheMaInd1.LAND

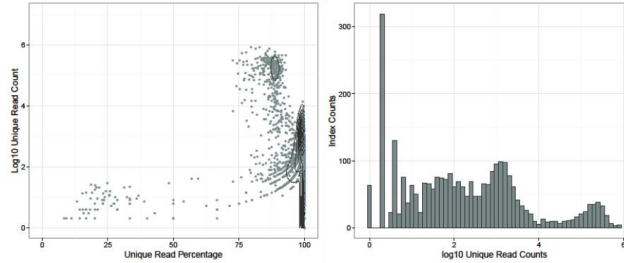

RheMaInd1.xSDS

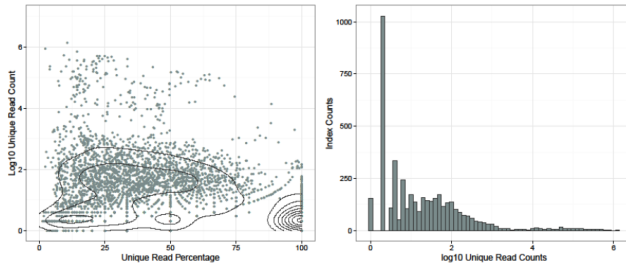

RheMaInd2.xSDS

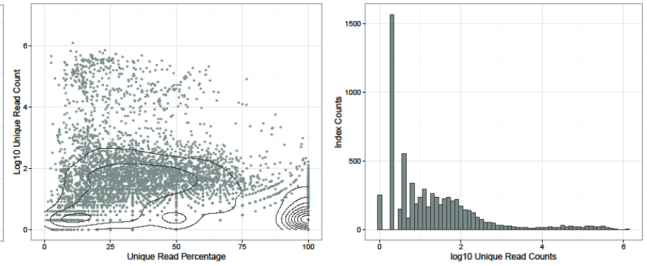

PDAC.xSDS

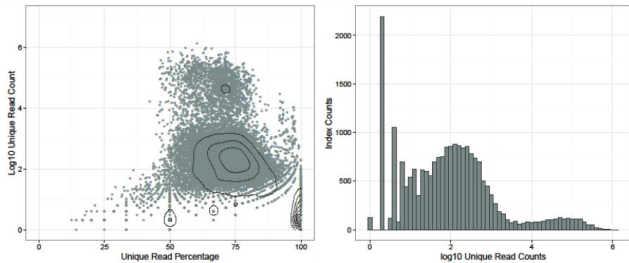

CRC.xSDS

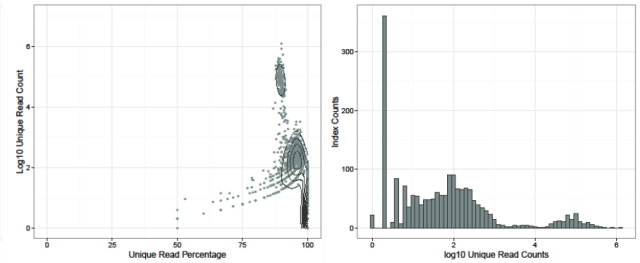

## Supplementary Figure 2 | SCI-seq library complexity and index read count distributions for all preparations.

For each preparation two plots are shown. Left: each point represents a unique index combination, x-axis is the fraction of unique reads assigned to that index combination, y-axis is the log<sub>10</sub> unique read count for the index combination. Contour lines represent point density. Right: A histogram of the log<sub>10</sub> unique read counts for each of the index combinations. We expect the majority of potential index combinations not to represent a single cell library and therefore containing very few unique reads (leftmost distribution), with the single cell libraries having far greater read counts (right distribution, or tail in lower performance libraries). Since the plot is on a log<sub>10</sub> scale, the noise distribution actually only takes up a minority of the total read counts.

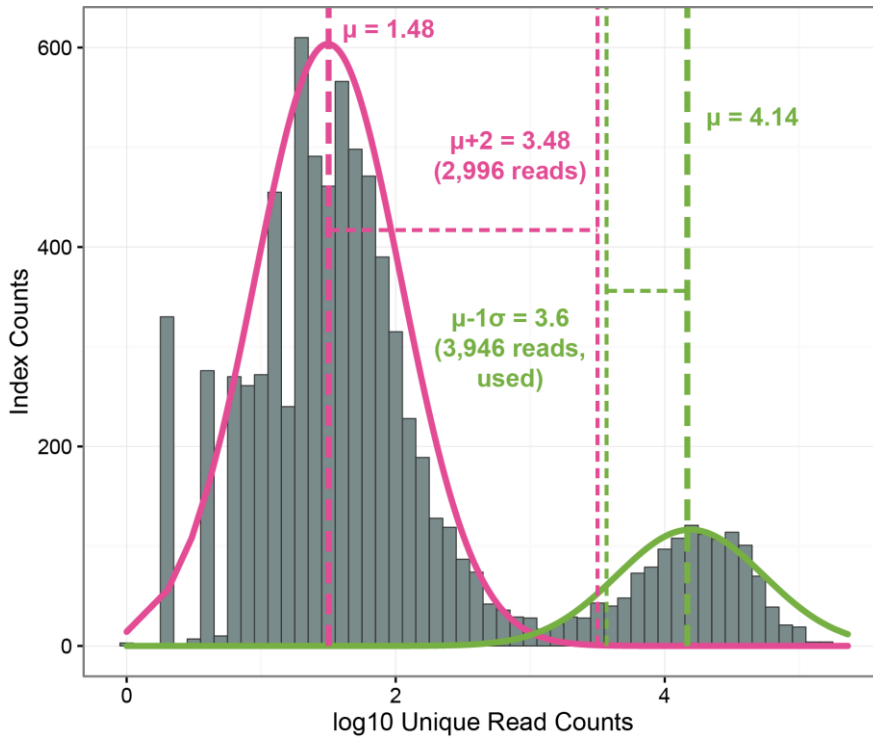

**Supplementary Figure 3 | SCI-seq single cell determination using a mixed model.** HeLa.LAND3 shown. normalmixEM of the R package *mixtools* is used to identify each distribution: noise index combinations (pink) and single cell libraries (green). The read count threshold to consider an index combination as a single cell library is the greater of either one standard deviation (in log<sub>10</sub> space) below the mean of the single cell distribution, or 2 greater (in log<sub>10</sub> space, thus 100 fold greater) than the mean of the noise distribution and at a minimum of 1,000. For the library shown, one standard deviation below the mean of the single cell component is greater and therefore used as the read count threshold.

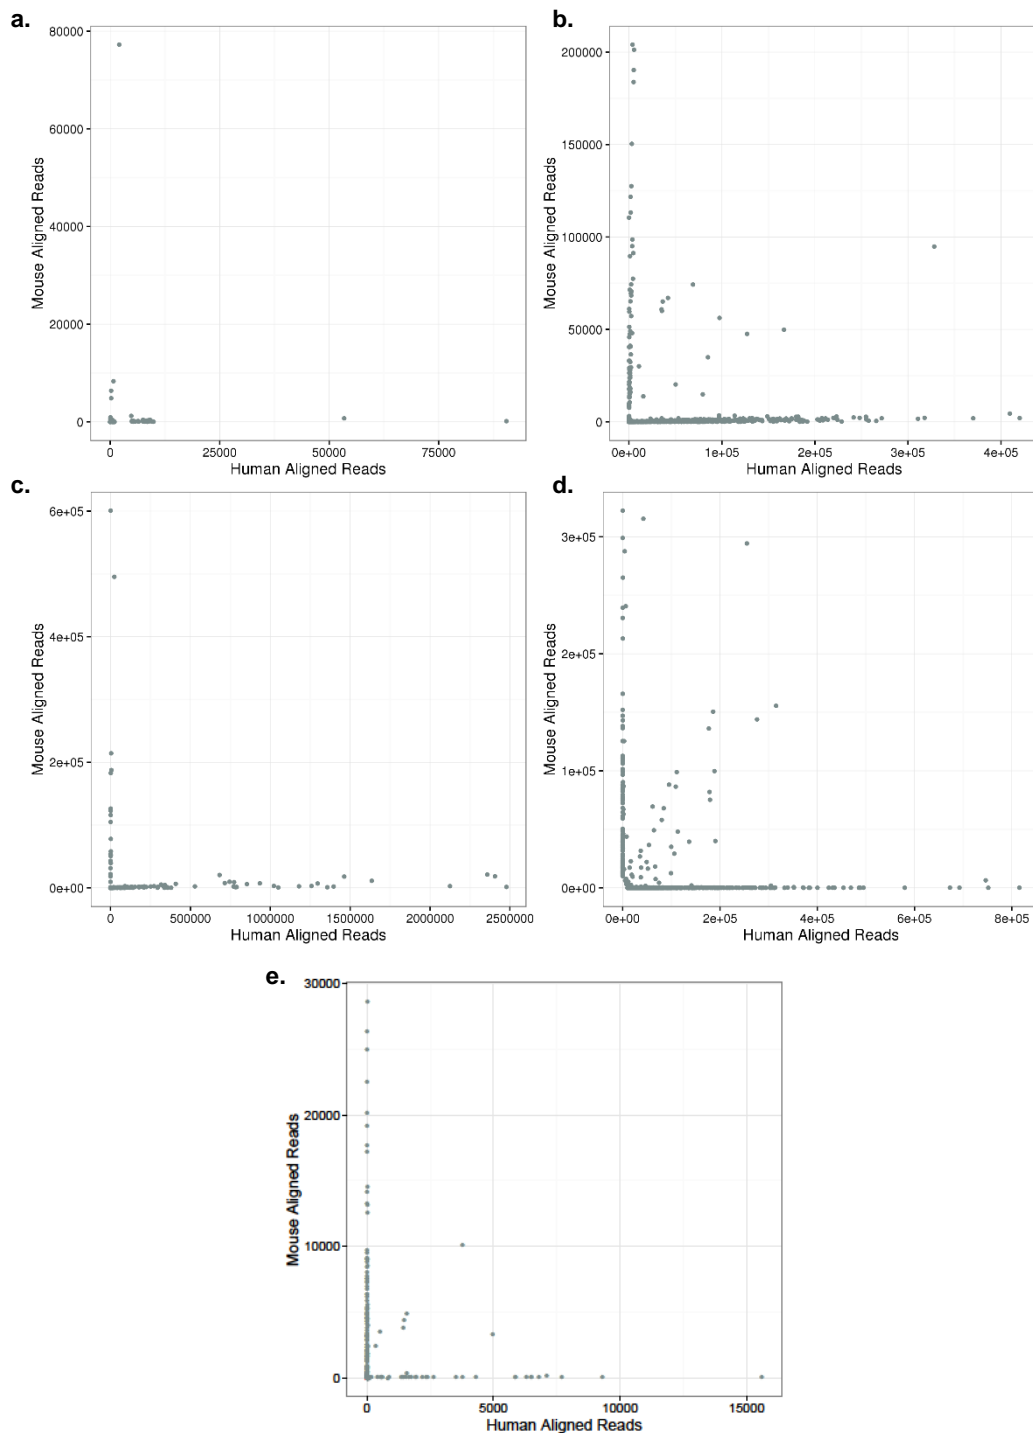

**Supplementary Figure 4 | SCI-seq on a mix of human and mouse cells.** For all panels the number of reads for each index component are plotted based on the count aligning to the human reference genome, or the mouse reference genome. **(a,b)** LAND nucleosome depletion on Human (GM12878) and Mouse (3T3), **(c,d)** LAND nucleosome depletion on Human (HeLa S3) and Mouse (3T3), **(e)** xSDS nucleosome depletion on Human (HeLa S3) and Mouse (3T3).

### HeLa S3 LAND

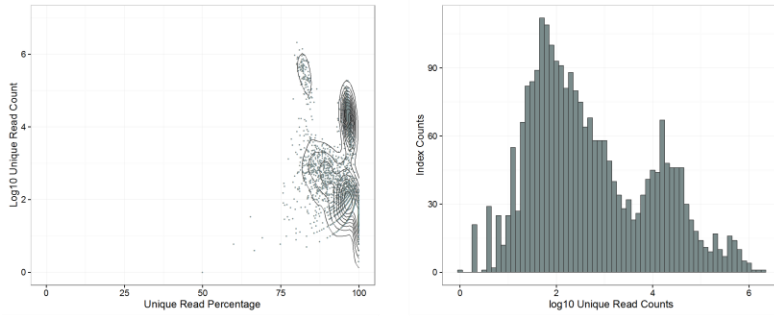

### PDAC xSDS

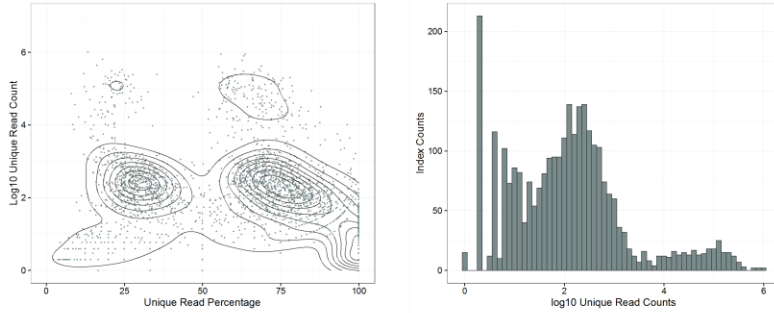

### GM12878 xSDS

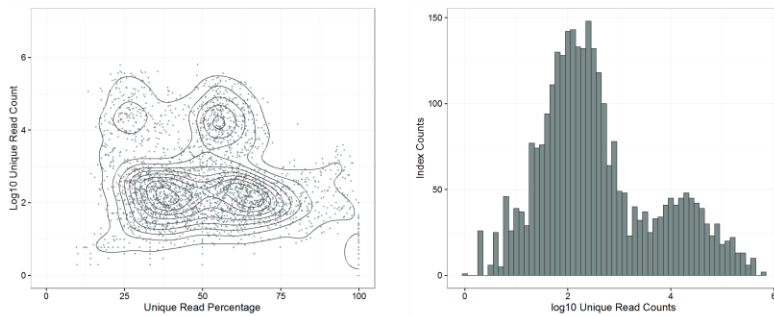

### Rhesus LAND

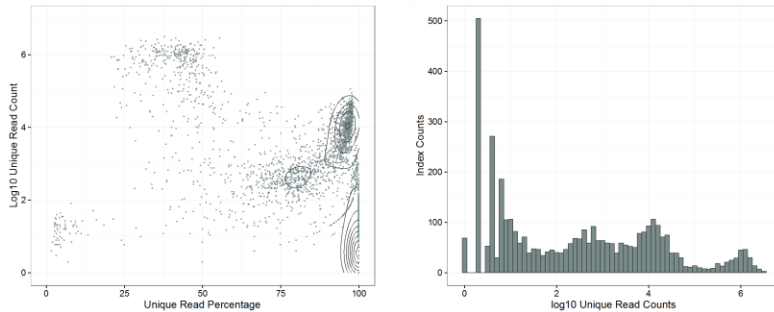

**Supplementary Figure 5 | SCI-seq library complexity and index read count distributions after deeper sequencing.** For each preparation two plots are shown as in S2 the left plot shows fraction of unique reads versus unique read count for each index combination. While the right plot shows a histogram of read counts for each index combination. Cells from wells sequenced more deeply are shown along with the rest of the plate that those wells belong to. The population of cells with lower complexity (more to the left) is the population that has been sequenced more deeply.

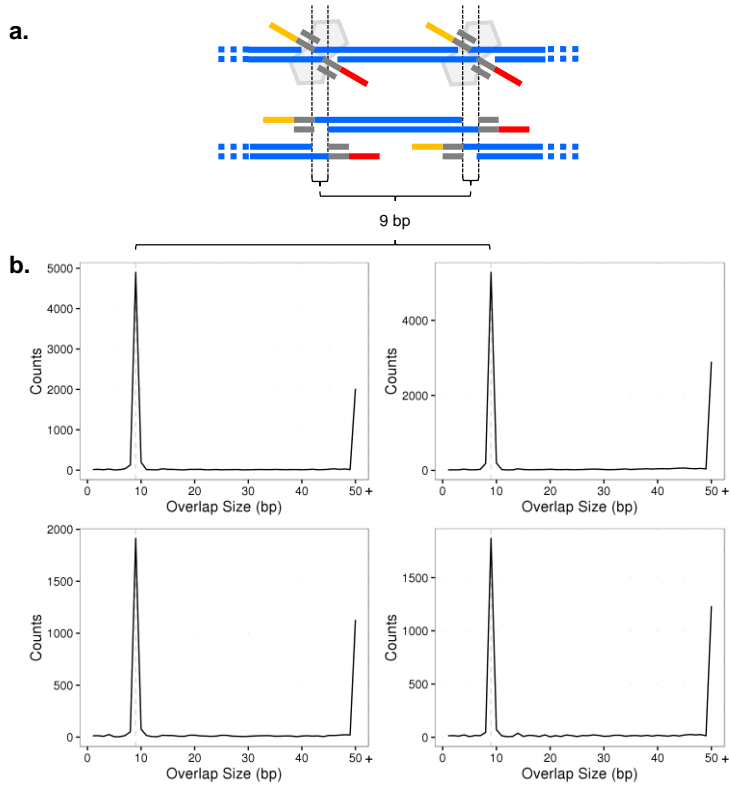

**Supplementary Figure 6 | 9bp read overlaps observed from sequencing adjacent transposition events in the same single cell. (a)** Diagram of how the 9bp copying occurs from the transposition event. **(b)** Representative single cells showing the size of all amplicon overlaps with a dashed line at 9bp.

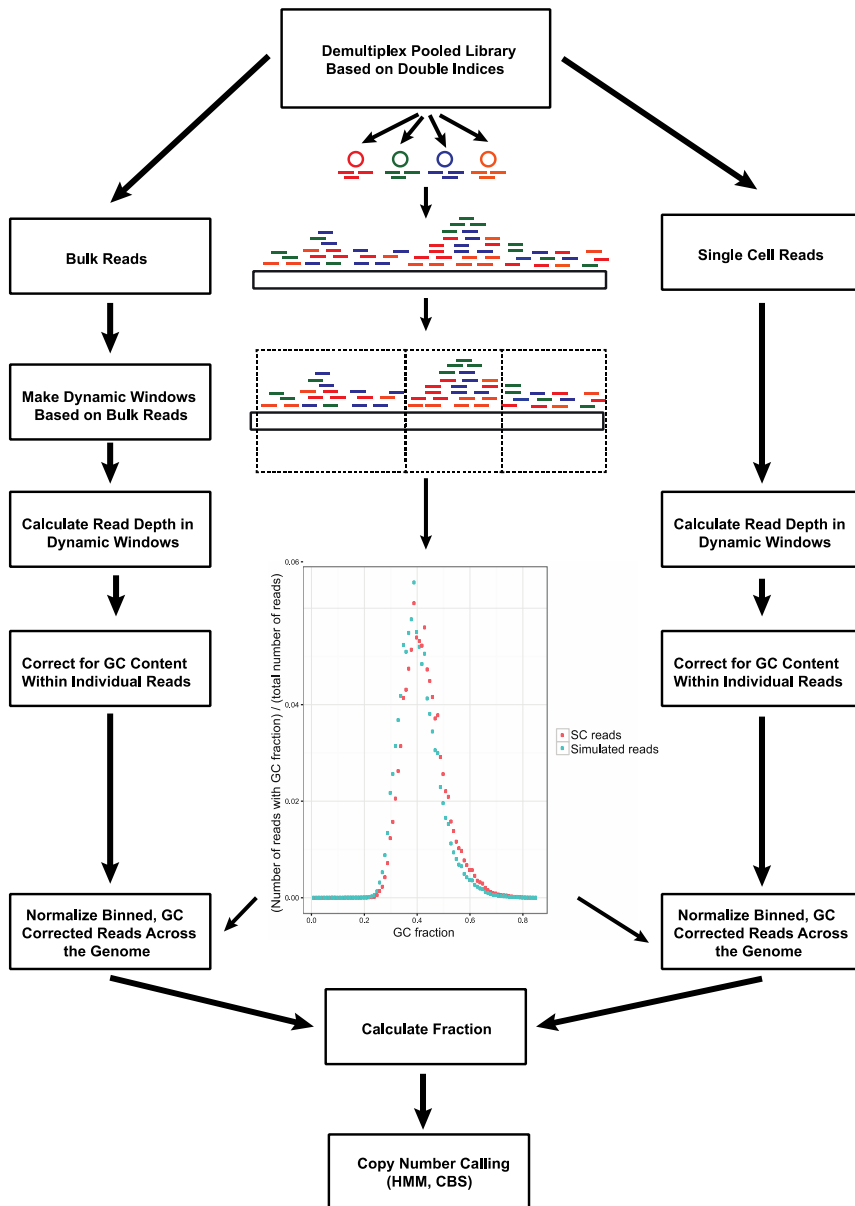

**Supplementary Figure 7 | Copy number calling computational workflow for HMM and CBS.** After calling, call sets for CBS and HMM were intersected together with Ginkgo and only calls present in all three sets were retained as the final call set.

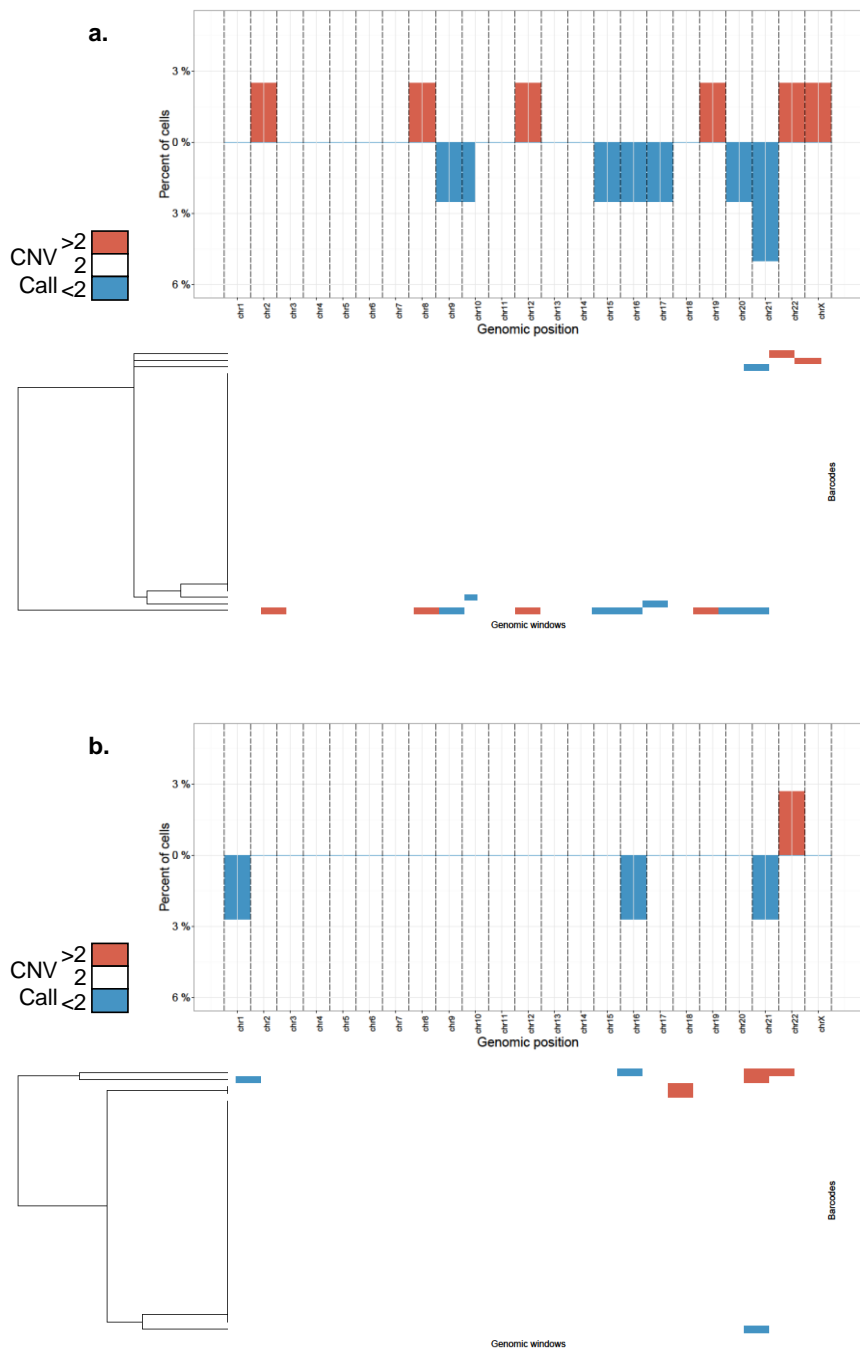

**Supplementary Figure 8 | CNV assessment using standard methods of single cell sequencing on GM12878. Top: Summary of chromosome arm amplifications and deletions, Bottom: hierarchical clustering of cells.**

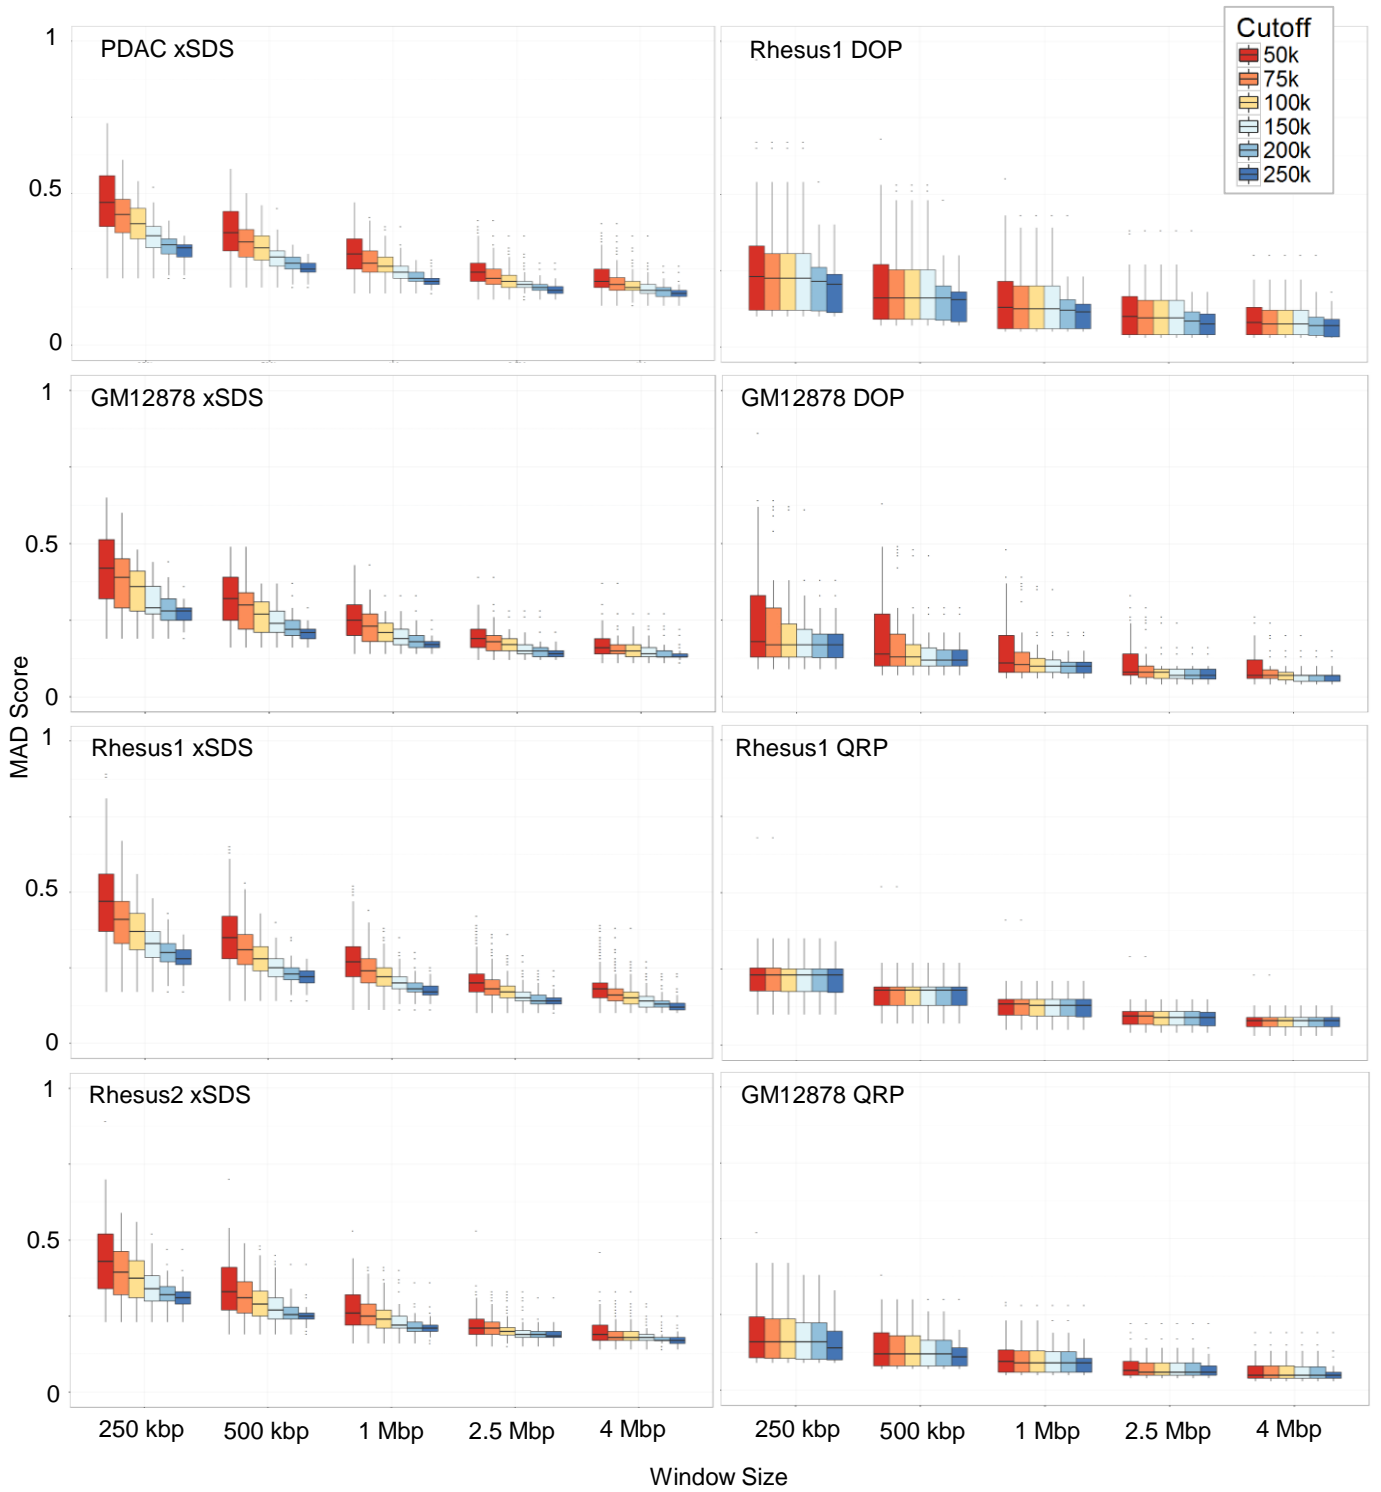



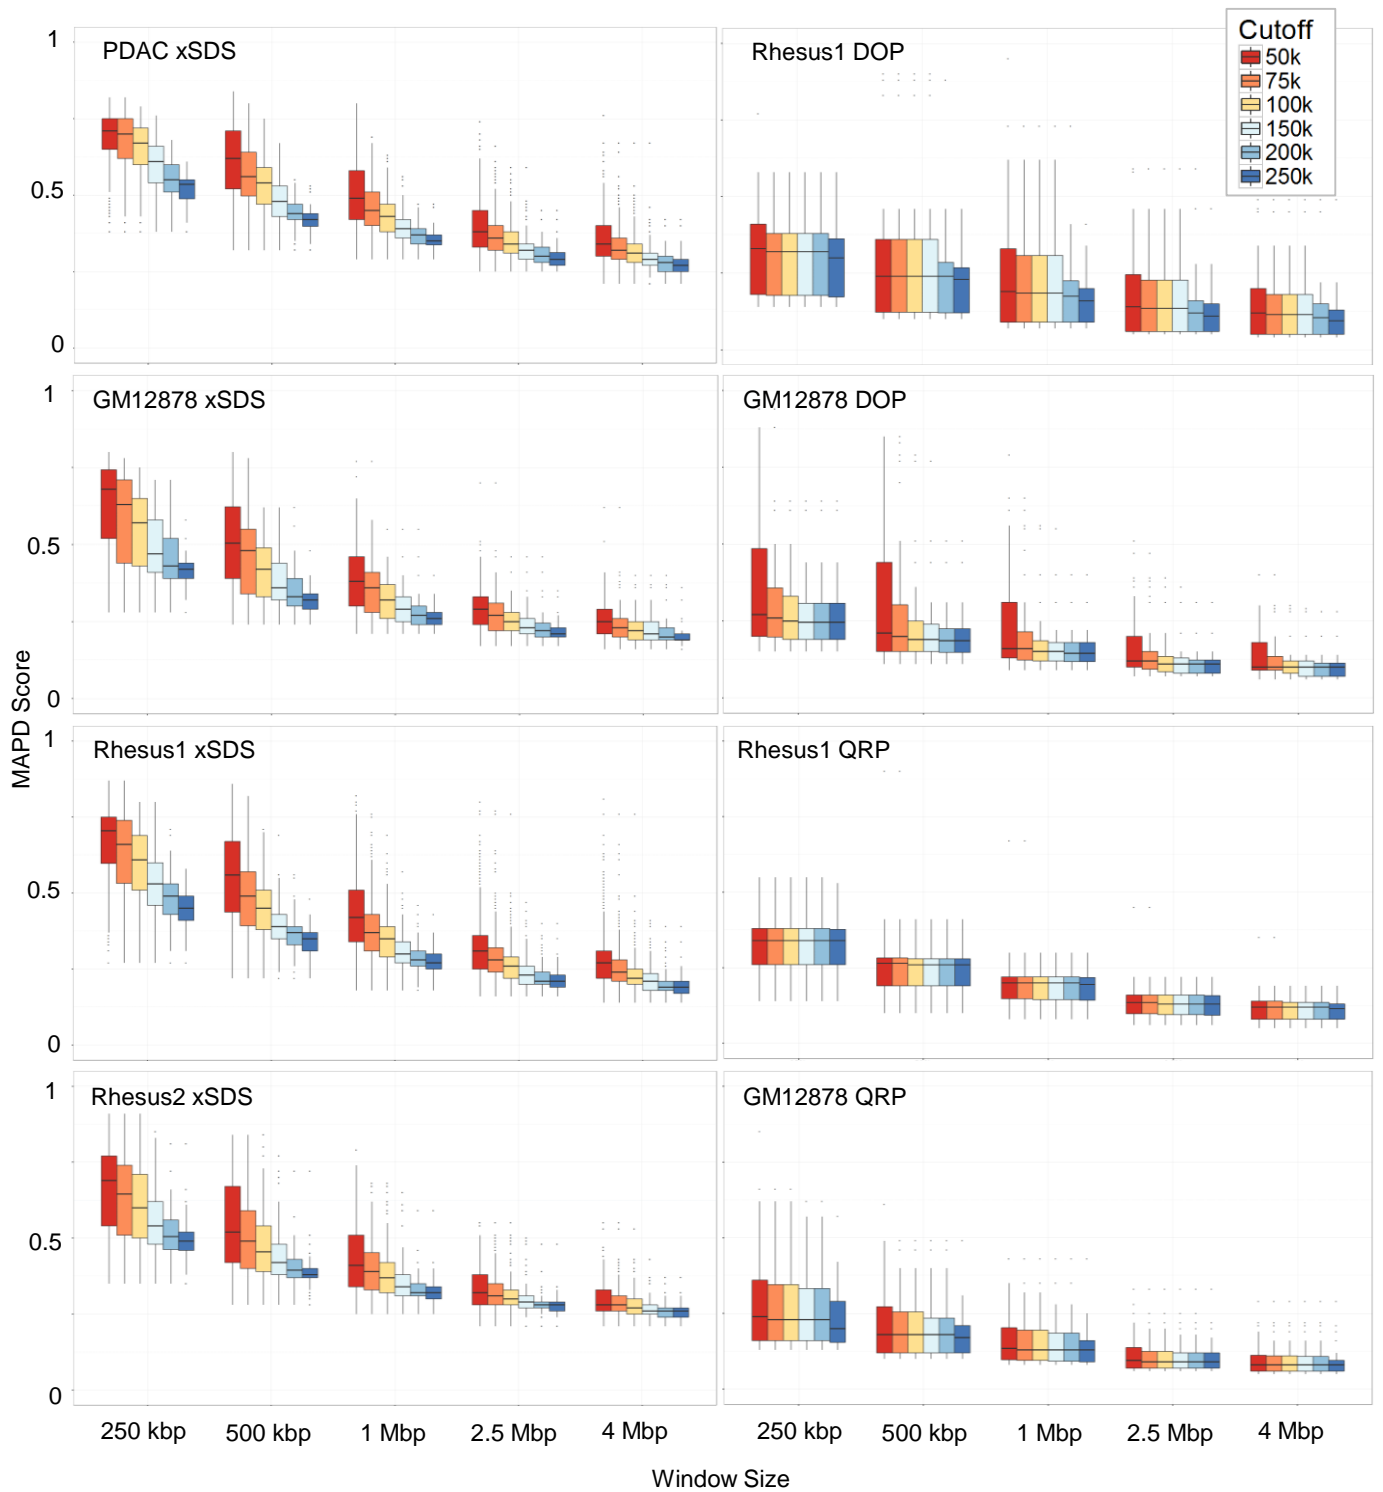

**Supplementary Figure 9 | Variance by window size and read count cutoff across all methods.** Plots showing the change in MAD or MAPD score as a function of window size and read counts per cell.

GM12878 xSDS

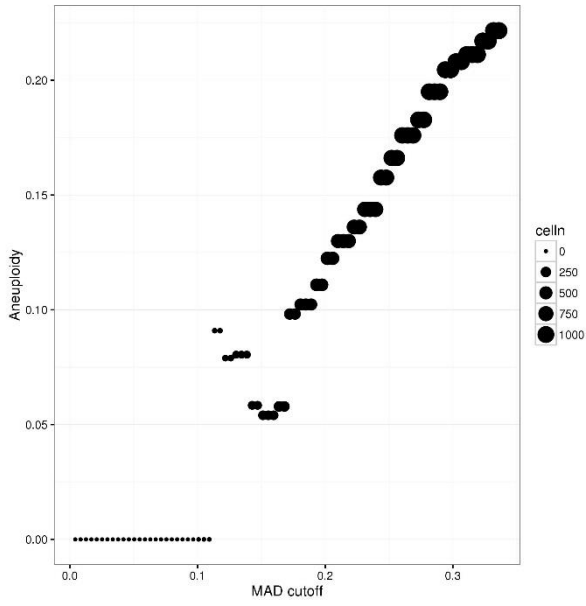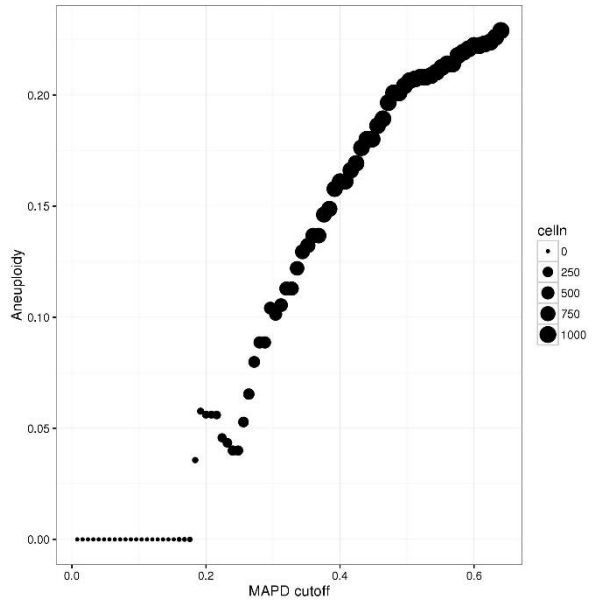

GM12878 DOP

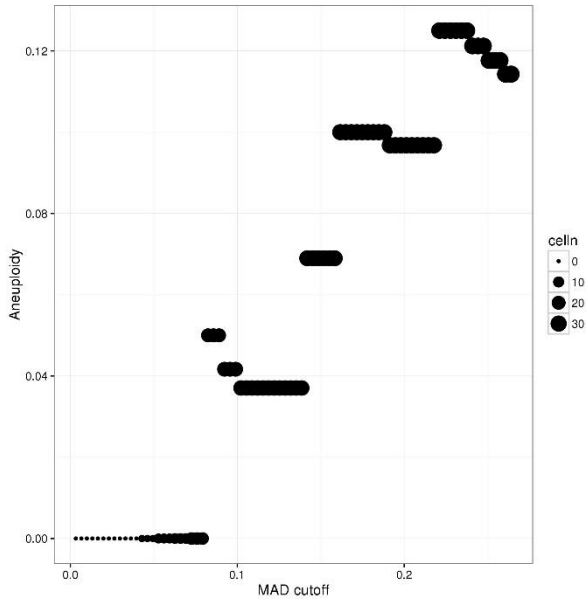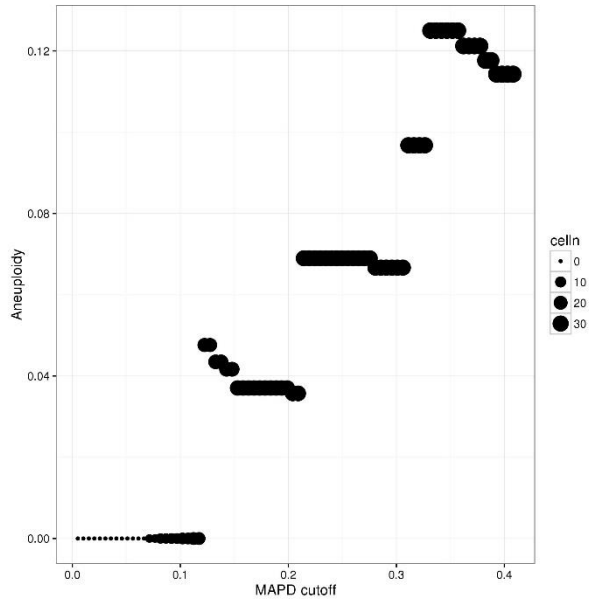

GM12878 QRP

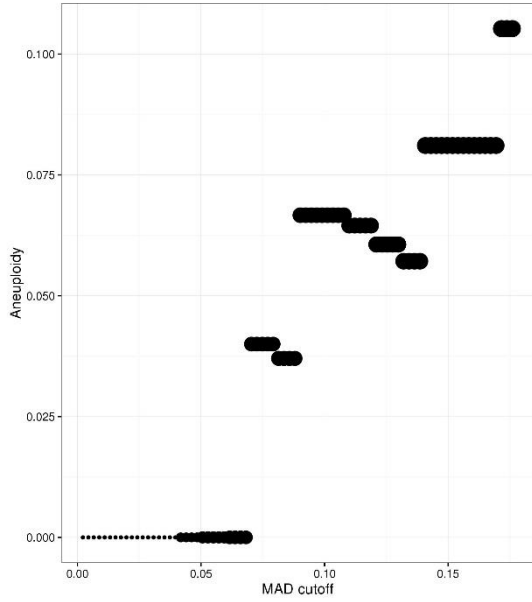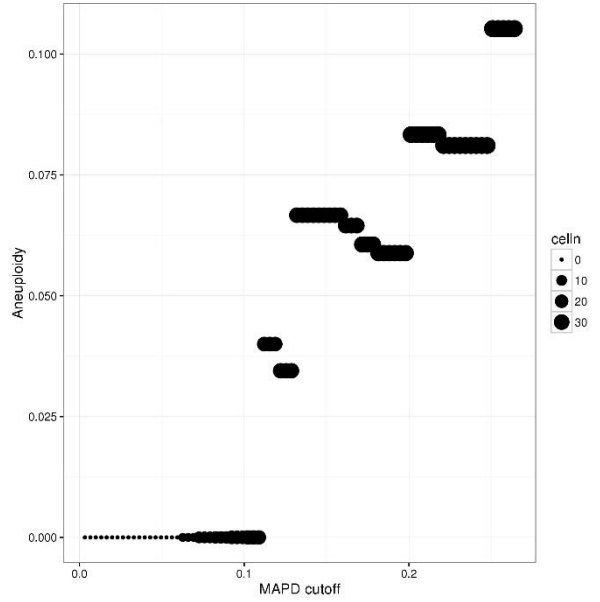

GM12878 LIS

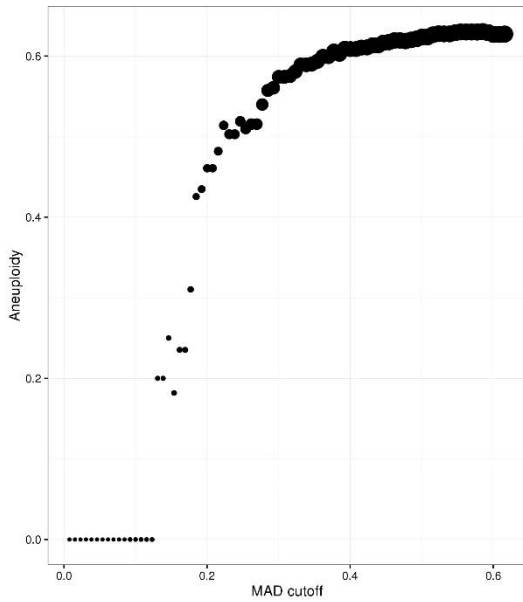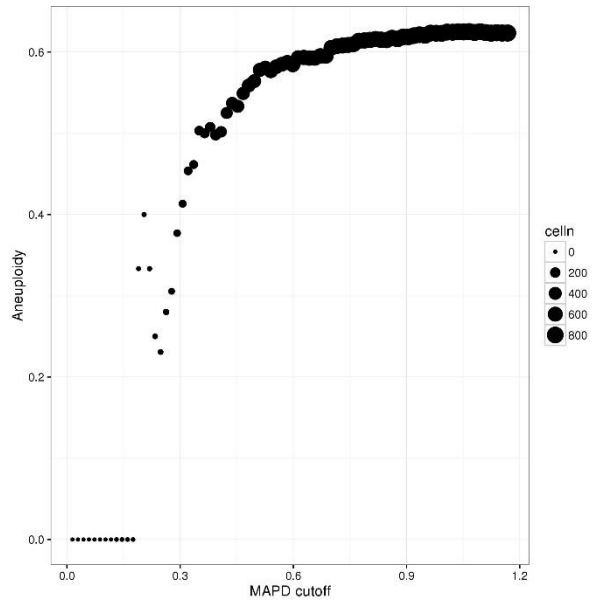

**Supplementary Figure 10 | GM12878 aneuploidy rates across variance score cutoffs.** Each point is the aneuploidy rate for the population of cells (y-axis), scaled by the number of cells included at a given score cutoff (x-axis).

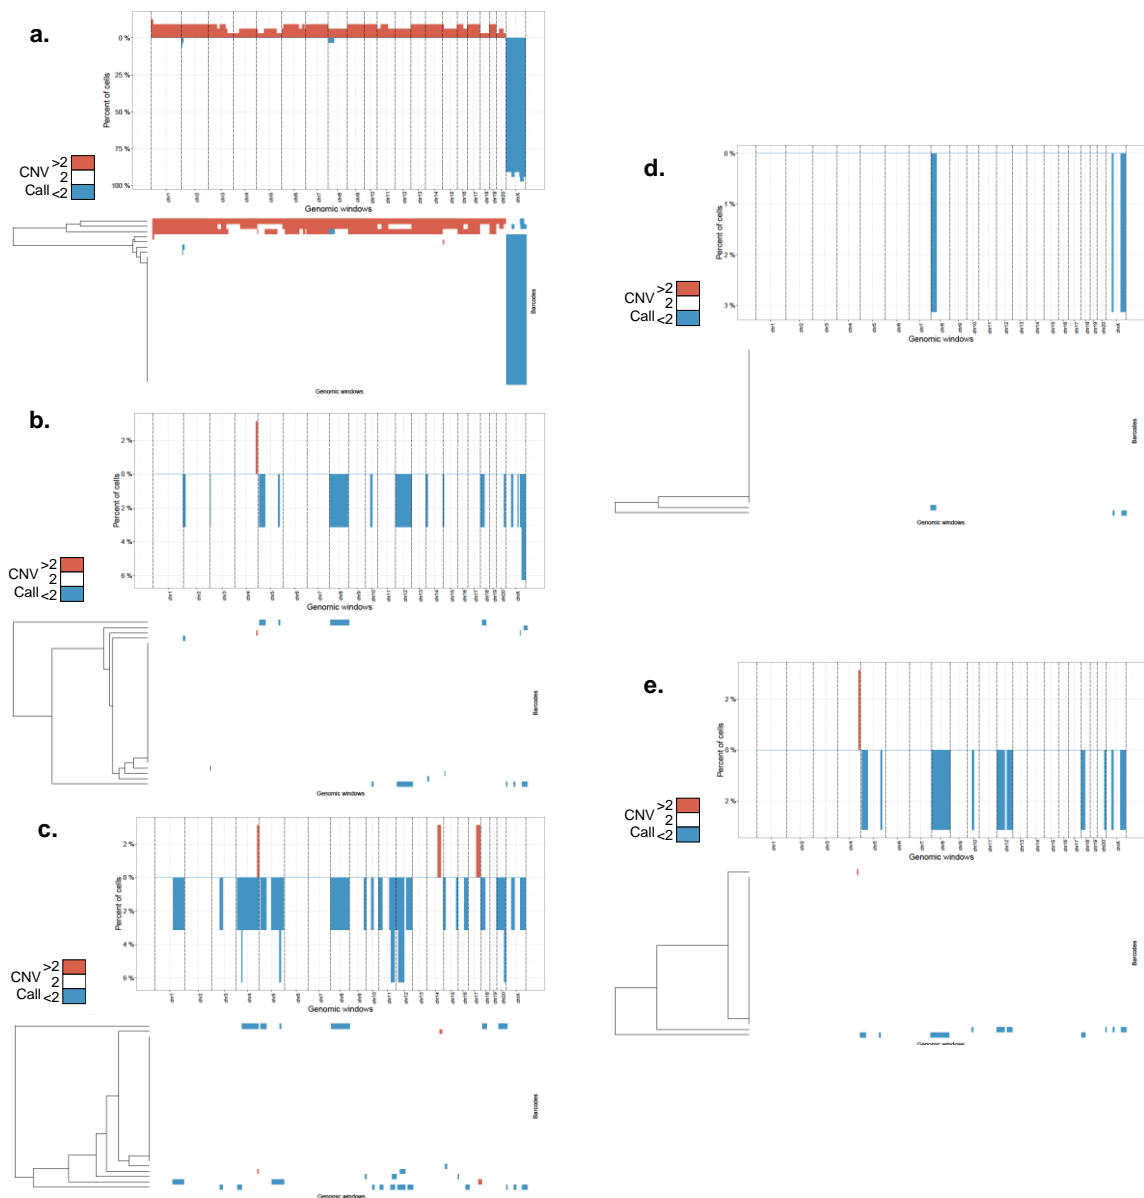

**Supplementary Figure 11 | CNV profiles for Rhesus frontal cortex, Individual 1 using quasi-random priming (QRP). (a) Ginkgo Calls, (b) CBS calls, (c) HMM calls, (d) Intersection of all three, and (e) Intersection of just CBS and HMM.**

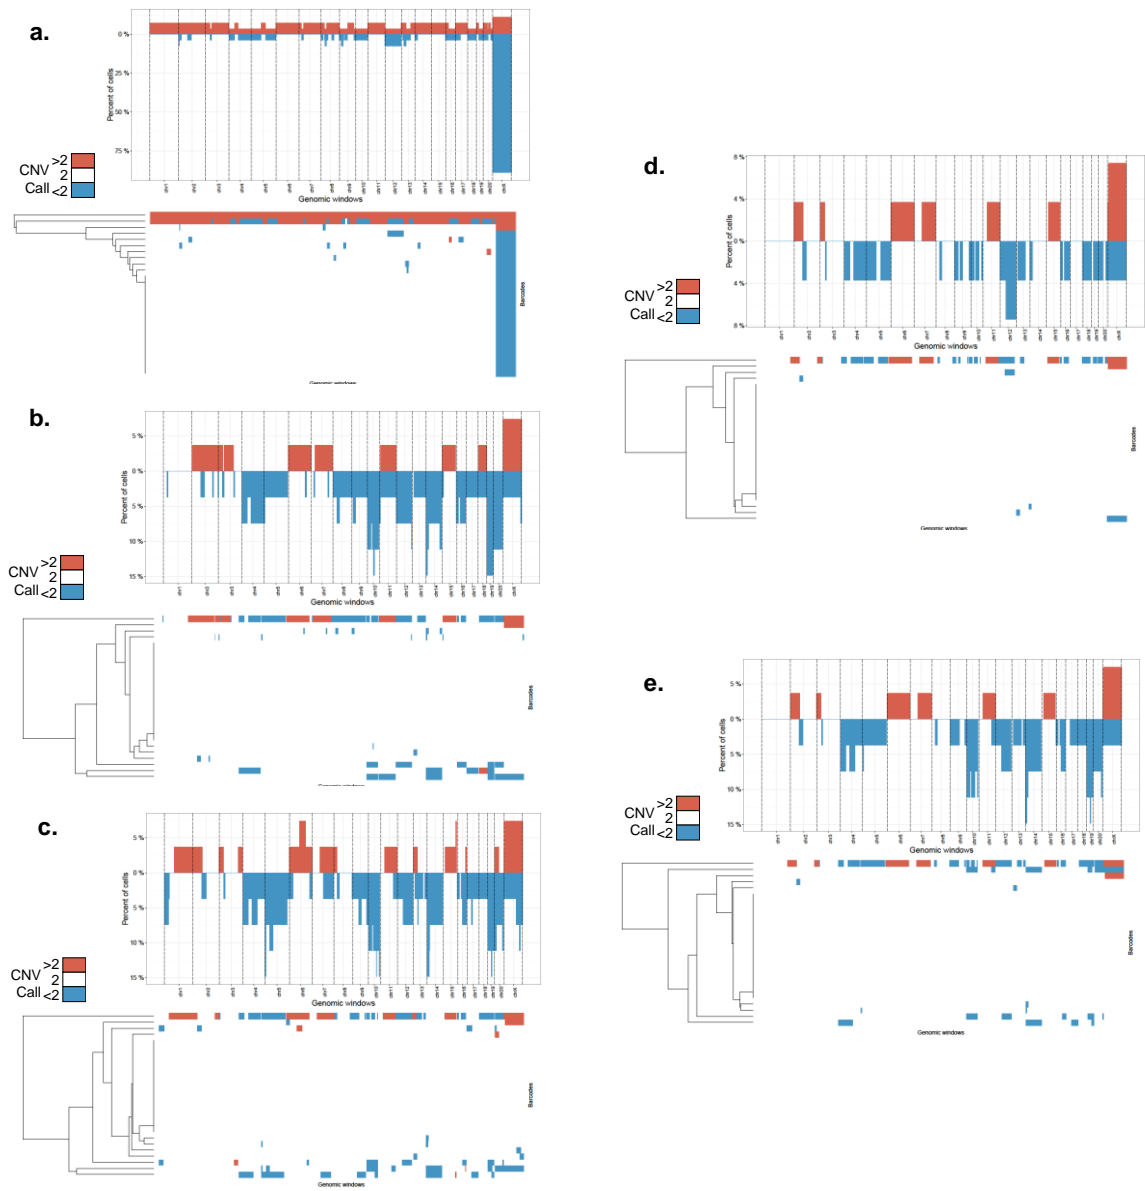

**Supplementary Figure 12 | CNV profiles for Rhesus frontal cortex, Individual 1 using degenerate oligonucleotide primed PCR (DOP). (a) Ginkgo Calls, (b) CBS calls, (c) HMM calls, (d) Intersection of all three, and (e) Intersection of just CBS and HMM.**

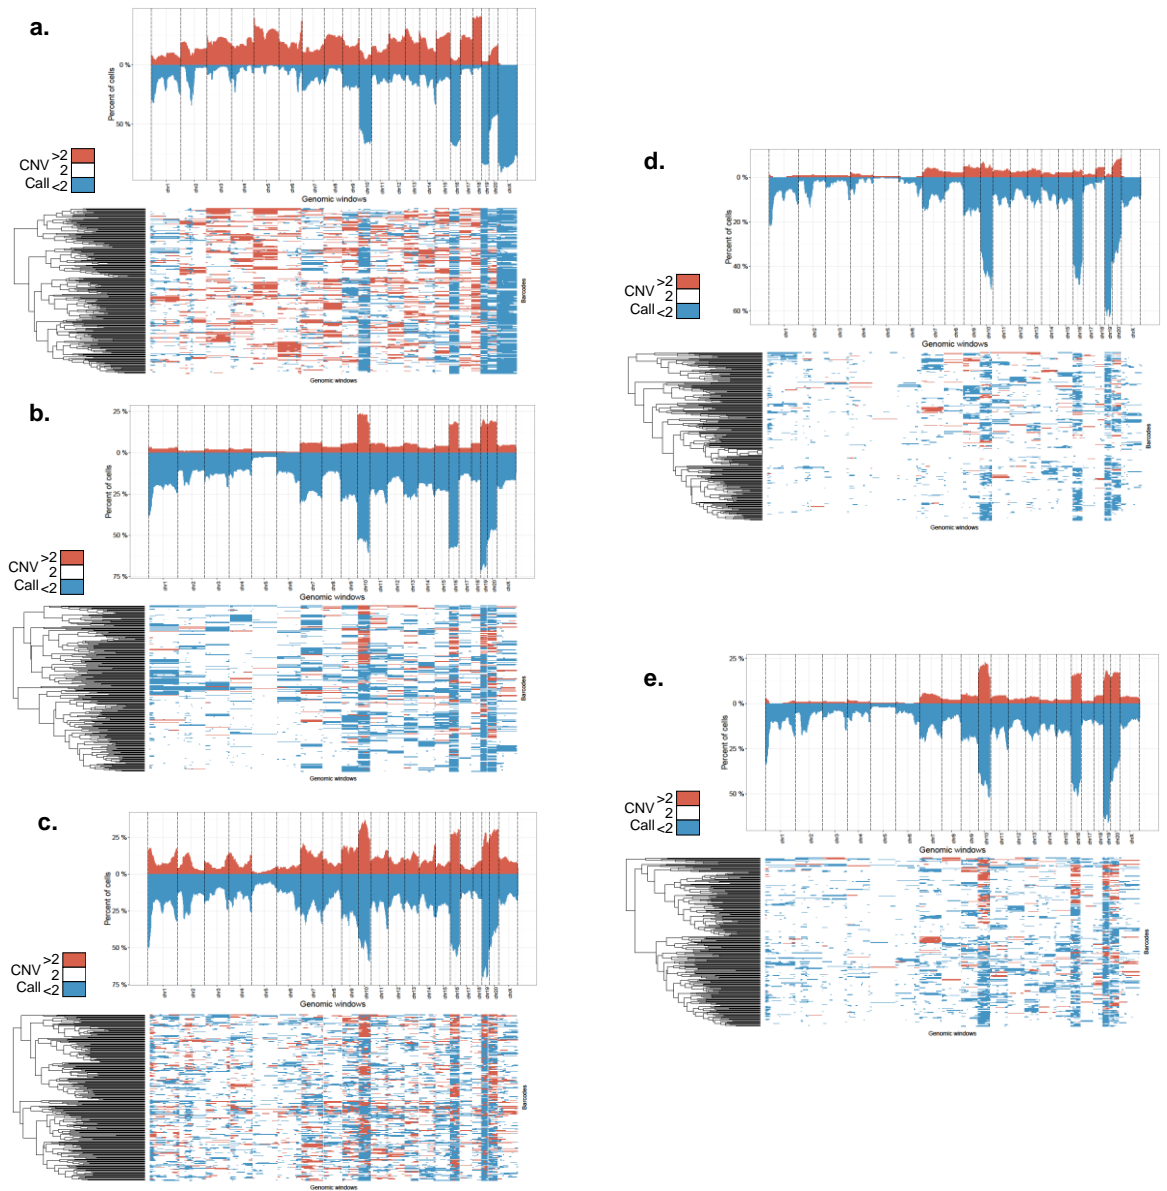

**Supplementary Figure 13 | CNV profiles for Rhesus frontal cortex, Individual 1 using SCI-seq with LAND nucleosome depletion. (a) Ginkgo Calls, (b) CBS calls, (c) HMM calls, (d) Intersection of all three, and (e) Intersection of just CBS and HMM.**

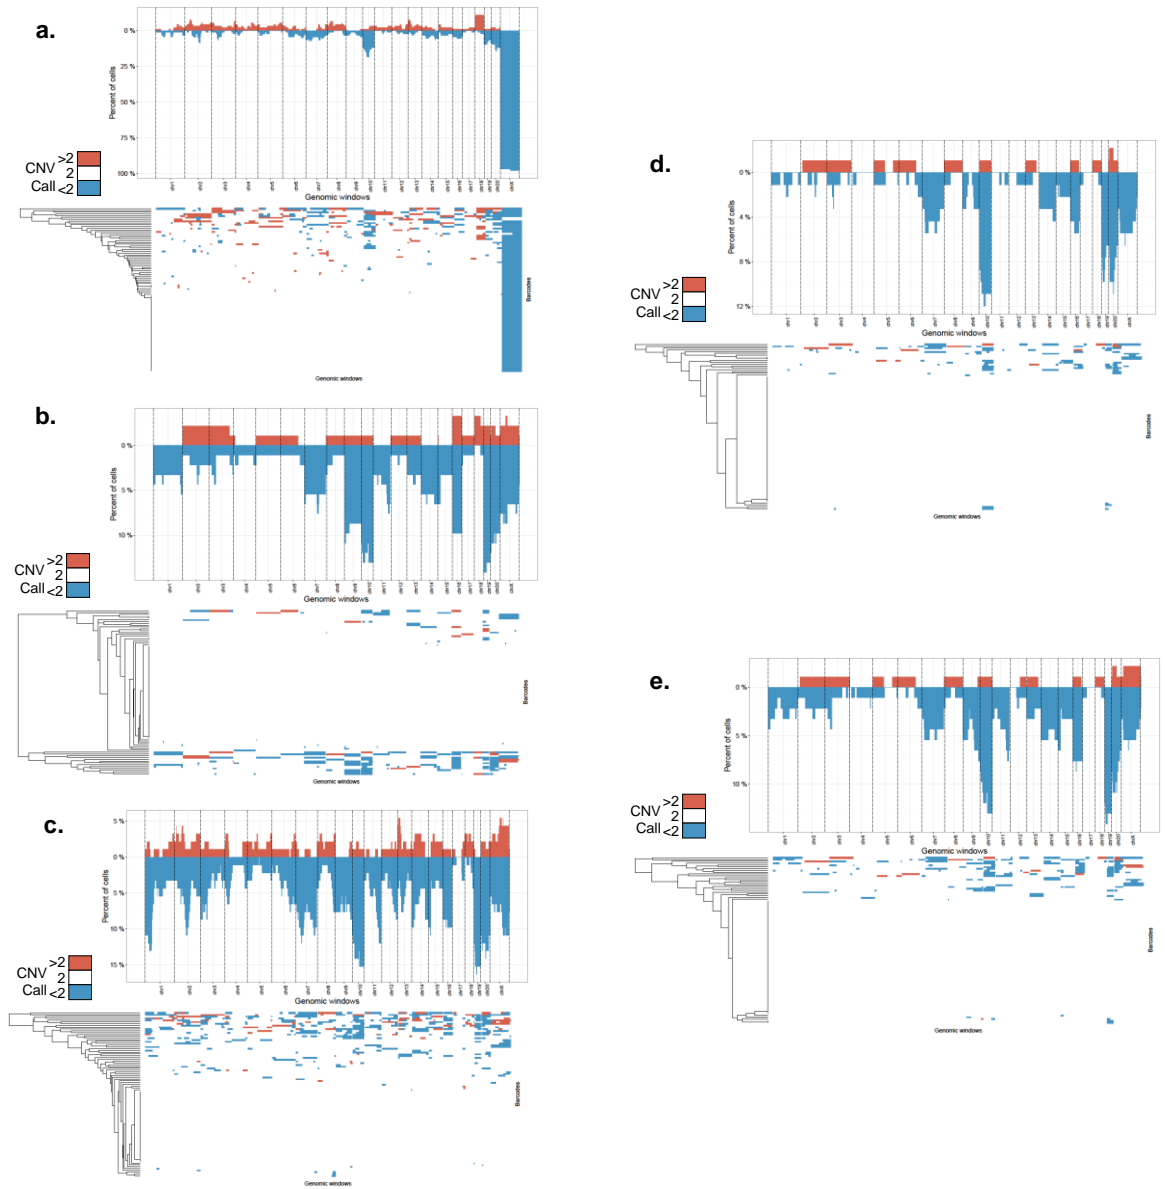

**Supplementary Figure 14 | CNV profiles for Rhesus frontal cortex, Individual 1 using SCI-seq with xSDS nucleosome depletion. (a) Ginkgo Calls, (b) CBS calls, (c) HMM calls, (d) Intersection of all three, and (e) Intersection of just CBS and HMM.**

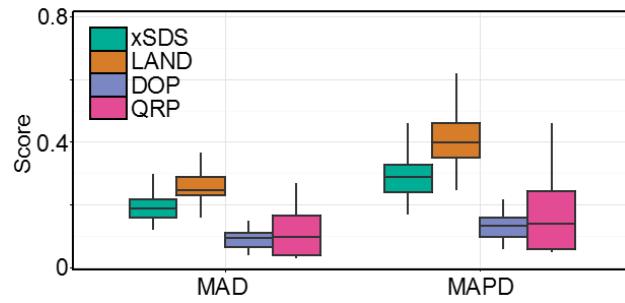

**Supplementary Figure 15 | Comparison of coverage uniformity for Rhesus frontal cortex individual 1.** Uniformity measures are very similar to those of GM12878 preparations (**Fig. 2b**).



Rhesus1 xSDS

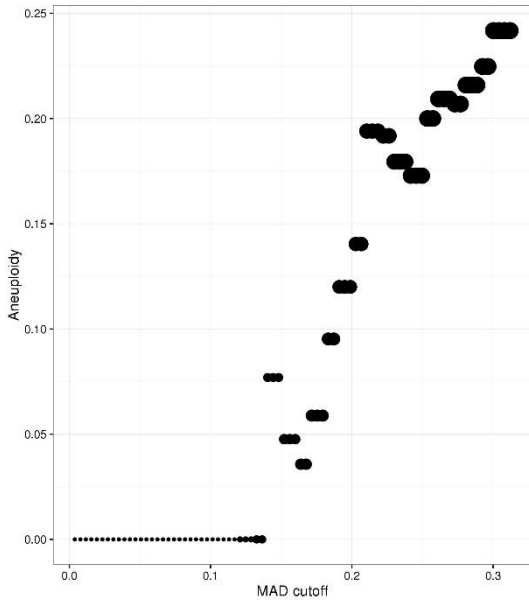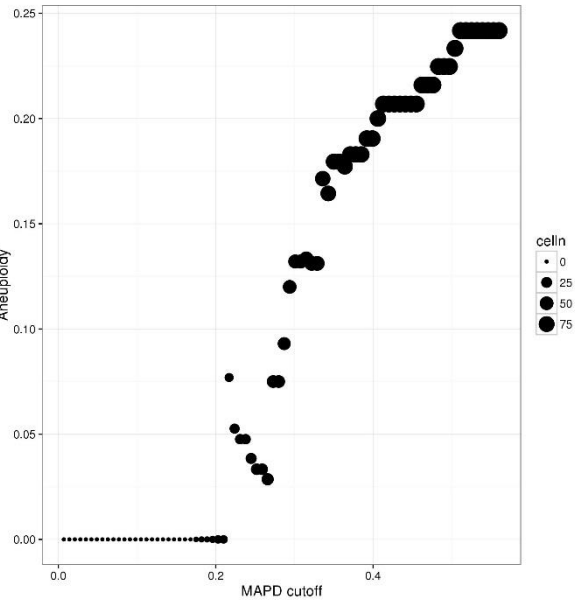

Rhesus2 xSDS

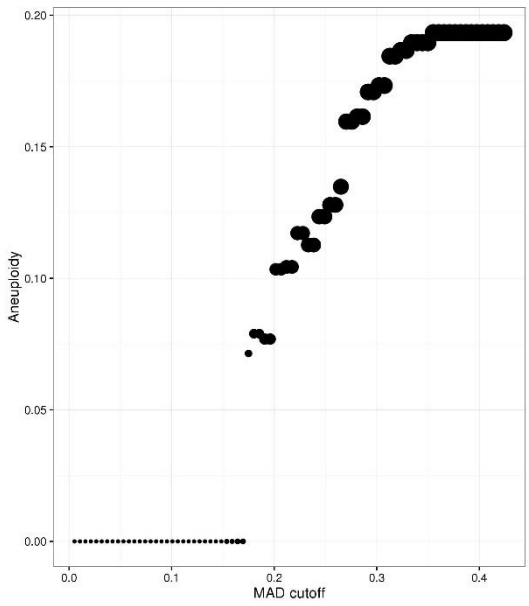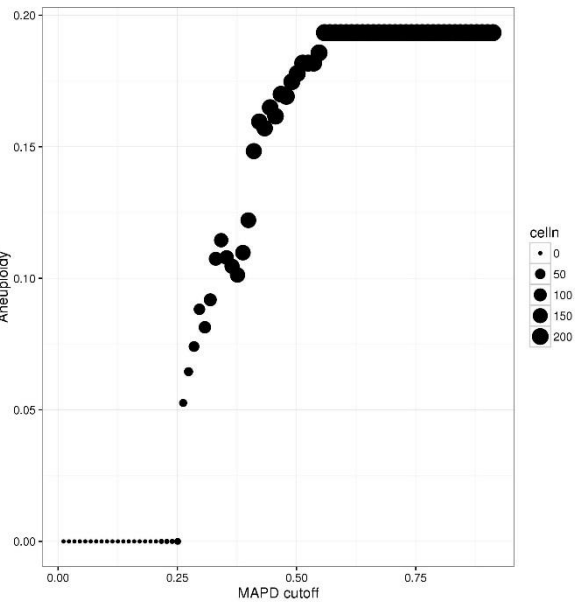

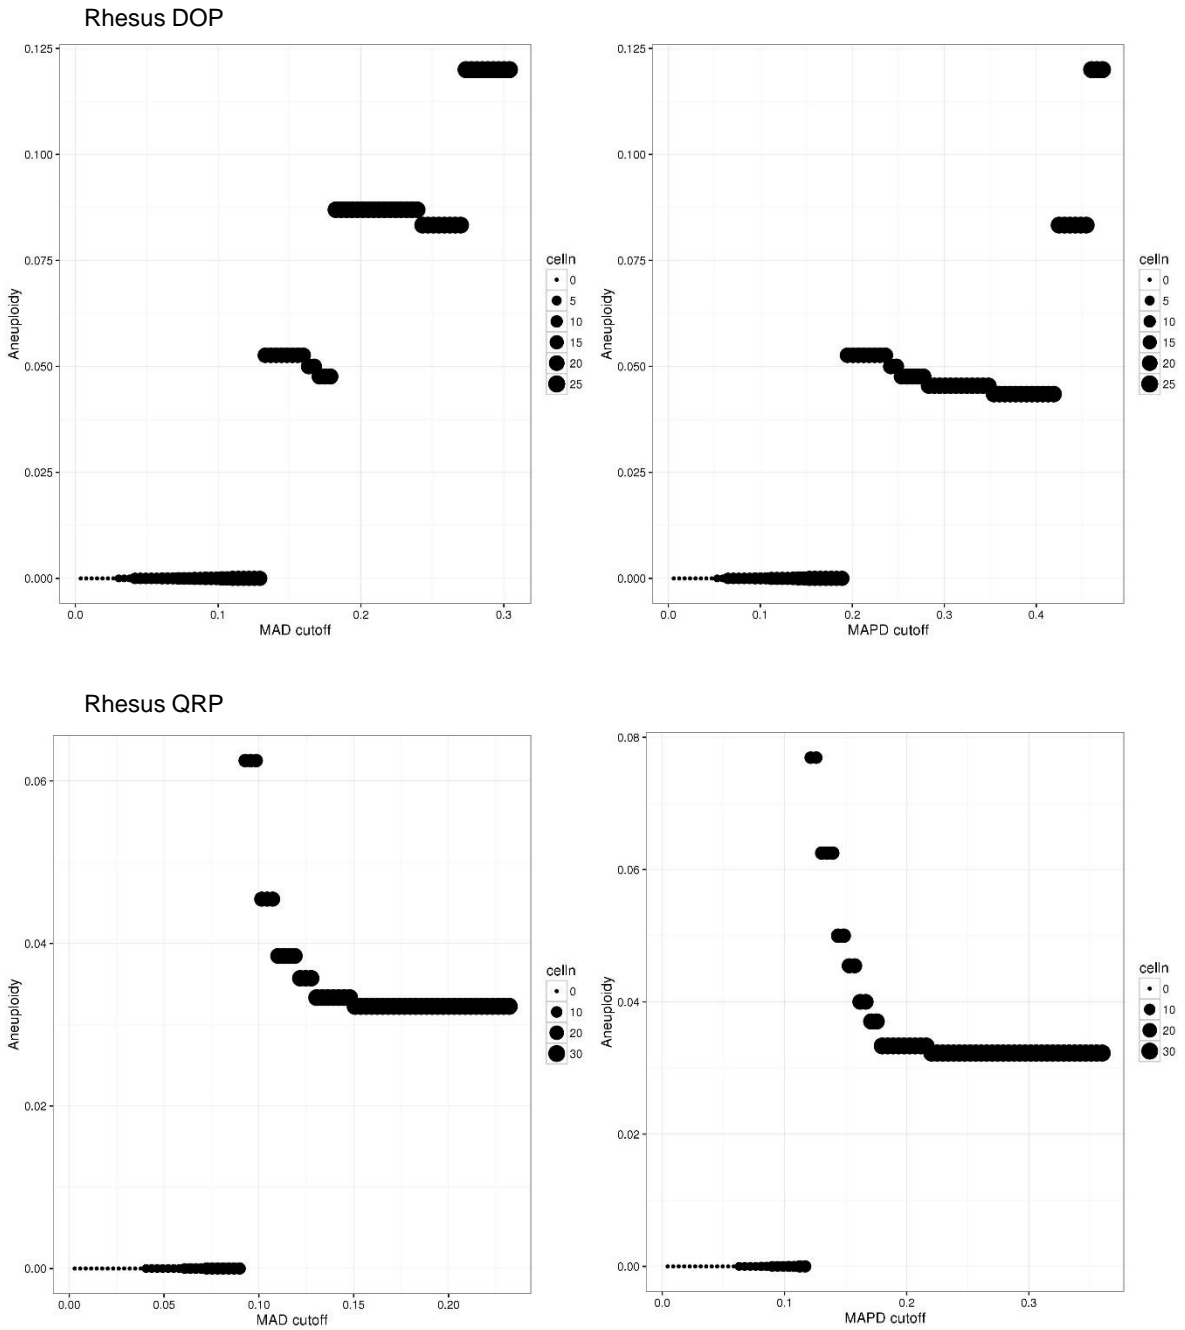

**Supplementary Figure 16 | Rhesus aneuploidy rates across variance score cutoffs.** Each point is the aneuploidy rate for the population of cells (y-axis), scaled by the number of cells included at a given score cutoff (x-axis).

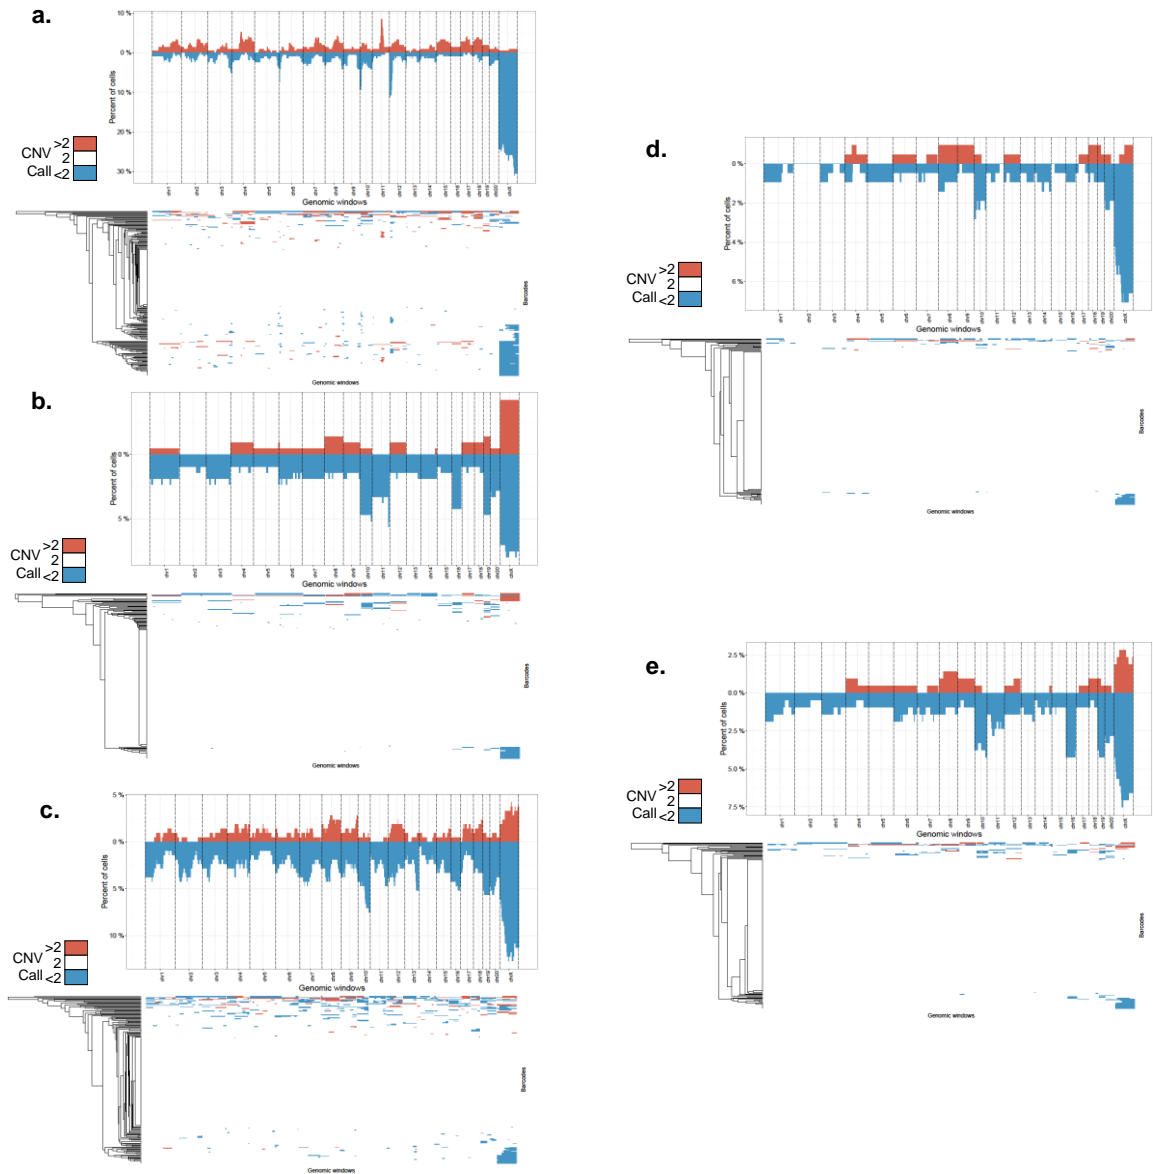

**Supplementary Figure 17 | CNV profiles for Rhesus frontal cortex, Individual 2 using SCI-seq with xSDS nucleosome depletion. (a) Ginkgo Calls, (b) CBS calls, (c) HMM calls, (d) Intersection of all three, and (e) Intersection of just CBS and HMM.**

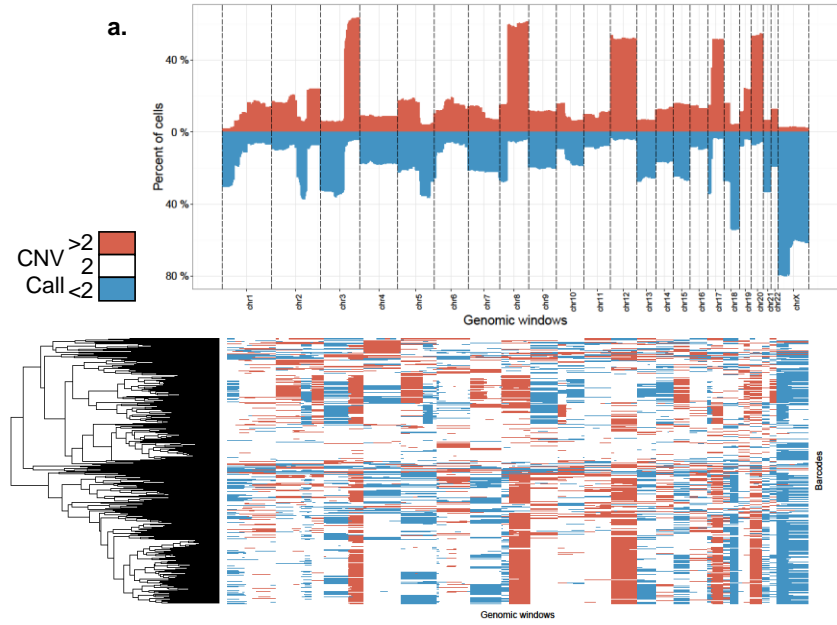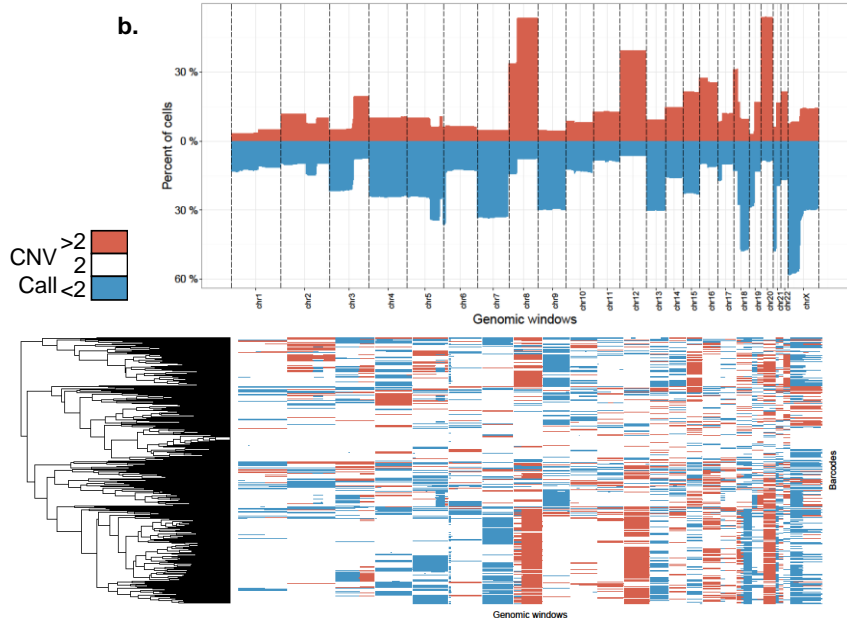

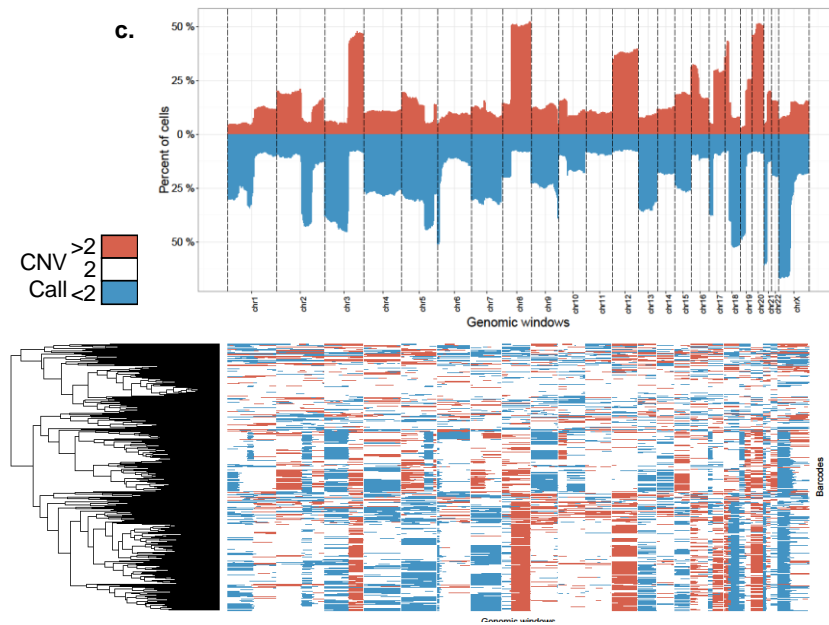

**Supplementary Figure 18 | SCI-seq using xSDS-based nucleosome depletion on pancreatic ductal adenocarcinoma.** Copy number call summary for 2.5 Mbp windows for the three methods of copy number calling used in the analysis: (a) Ginkgo, (b) CBS, and (c) HMM.

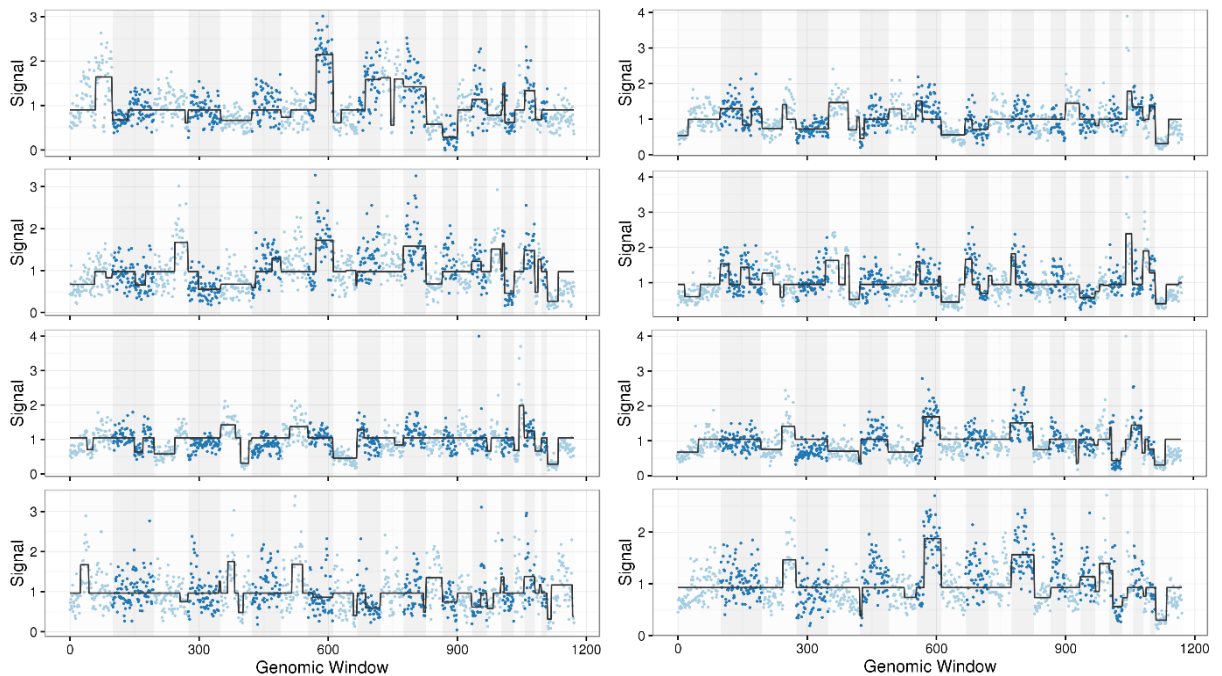

**Supplementary Figure 19 | Single cell CNV calls on primary PDAC using xSDS SCI-seq.** Representative single cell signal plots.

## Chromosome segmented regions

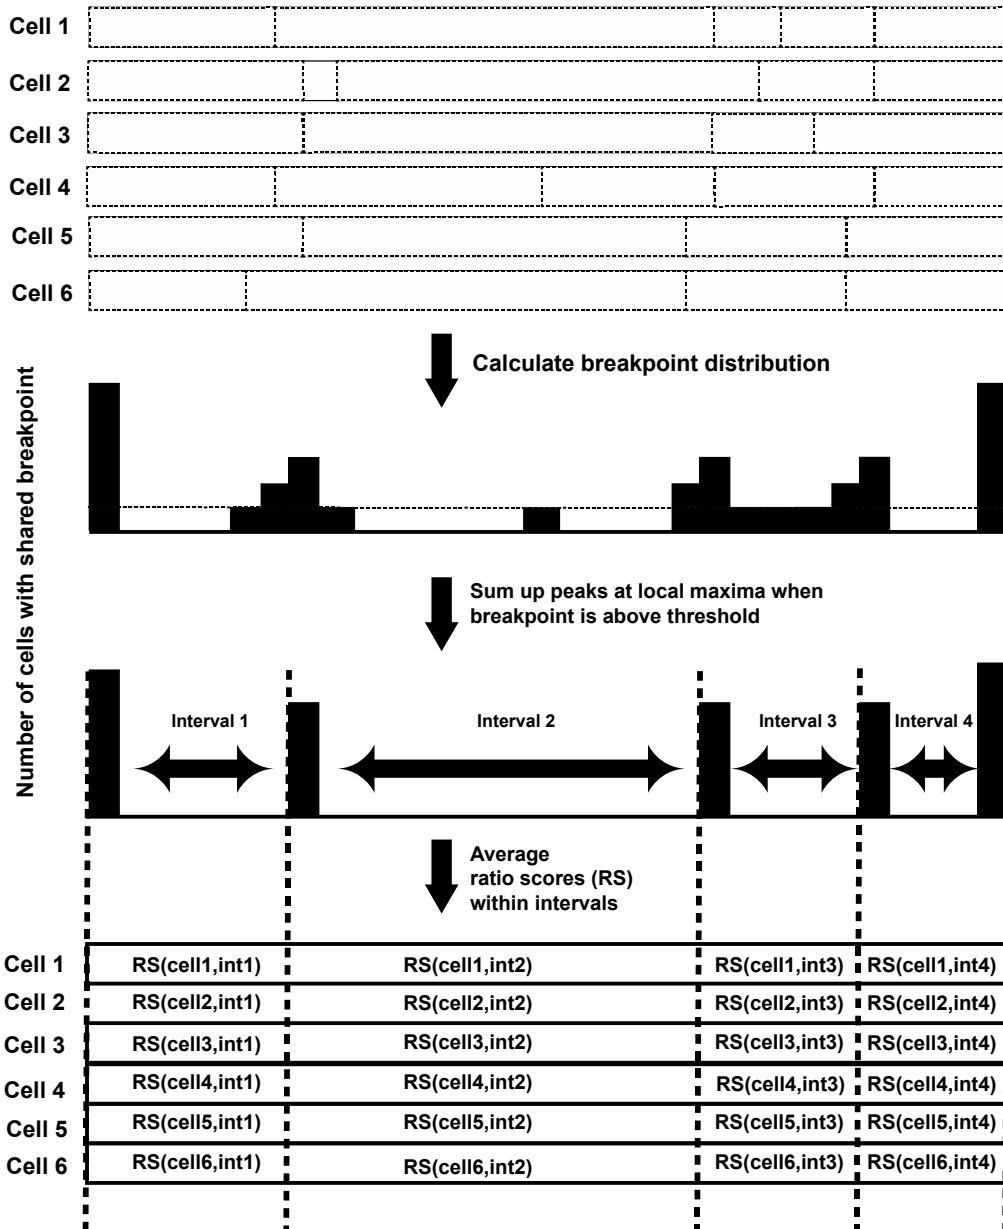

**Supplementary Figure 20 | Schematic of breakpoint analysis workflow.** First, individual cells are analyzed for breakpoints. Breakpoints from all cells are merged and locally summed when above threshold. Intervals are defined between local shared breakpoints and average ratio scores are found within each interval.

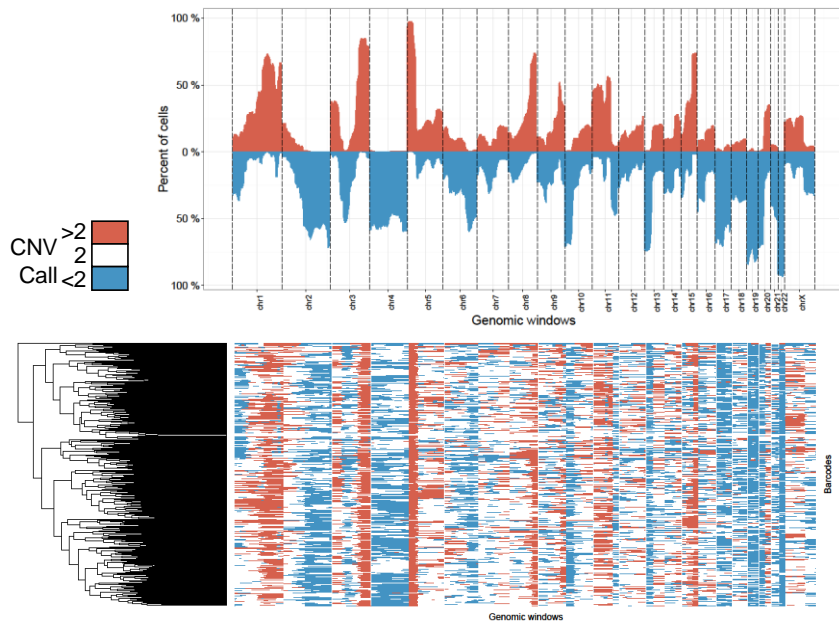

**Supplementary Figure 21 | SCI-seq using LAND-based nucleosome depletion on HeLa S3 using the Hidden Markov Model method for copy number variant calling.** Summary of windowed (2.5 Mbp) calls and hierarchical clustering of cells. CBC copy number calling resulted in a heavy bias against subchromosomal calls and Ginkgo failed to properly identify the ploidy in a number of cells resulting in a majority of cells called as entirely amplified.

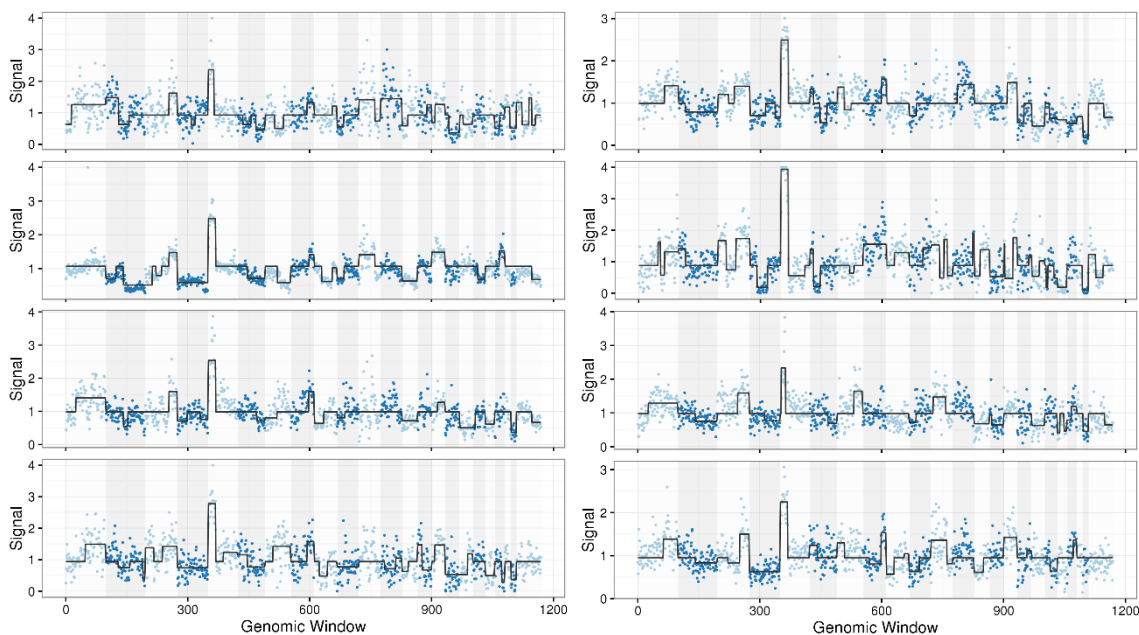

**Supplementary Figure 22 | SCI-seq using LAND-based nucleosome depletion on HeLa S3 copy number variant calling in single cells using the Hidden Markov Model method.** Representative single cell signal plots. A signal of 1 corresponds to the mean ploidy of 2.98.

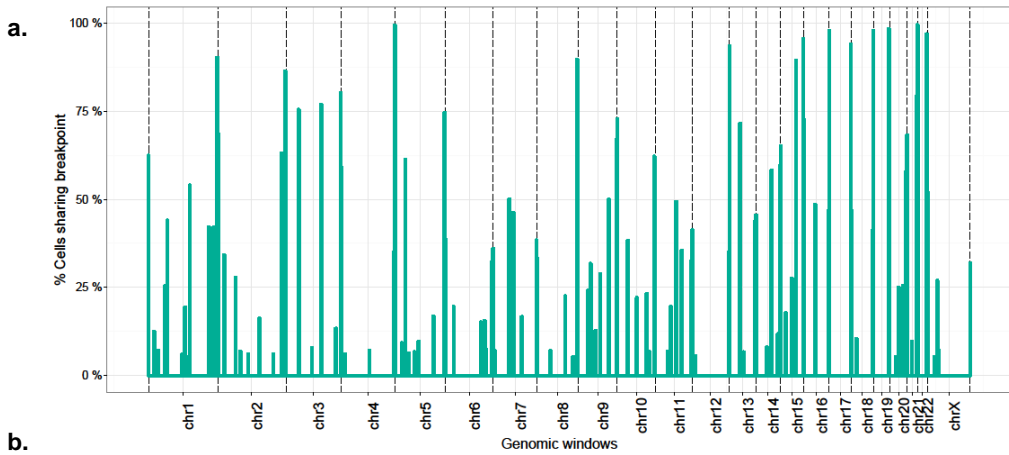

**b.**

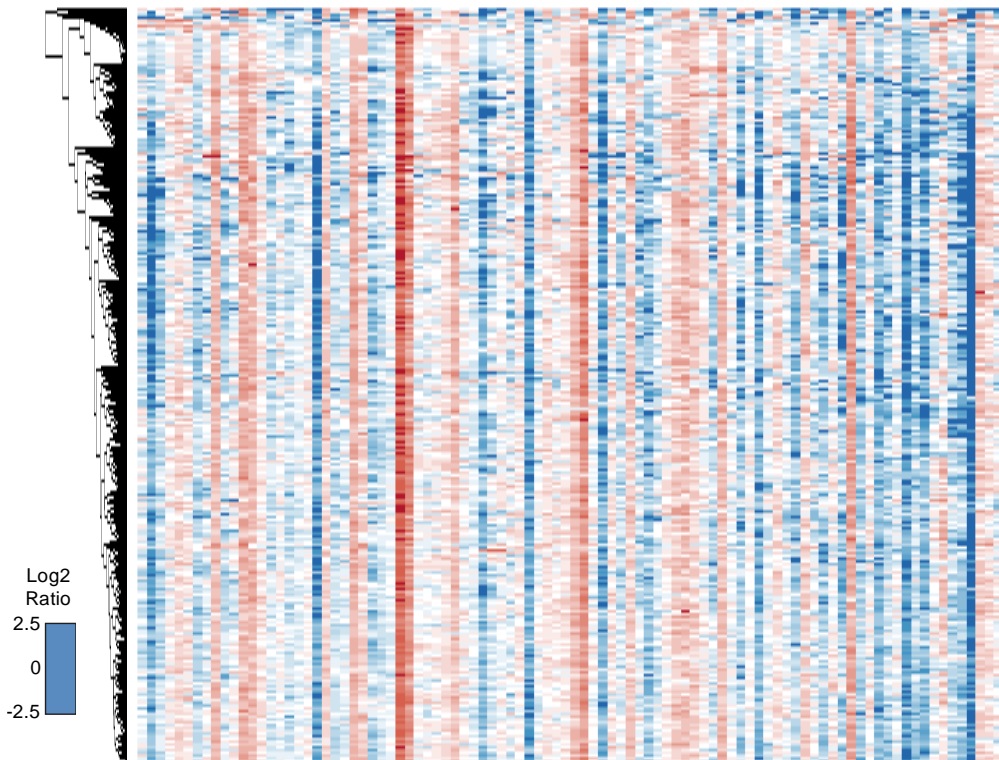

**Supplementary Figure 23 | Breakpoint analysis of HeLa. (a)** Breakpoints identified in the HeLa cell line from an HMM analysis using 2.5 Mbp windows. **(b)** Log<sub>2</sub> matrix of HeLa breakpoint windows for cells normalized to GM12878.



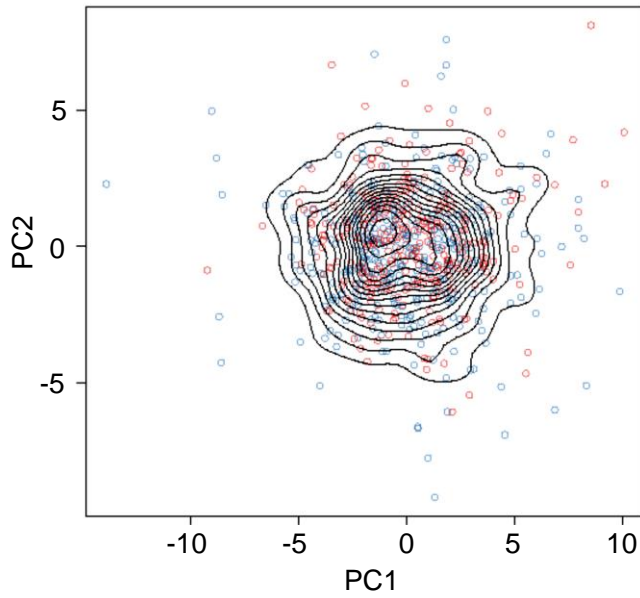

**Supplementary Figure 24 | PCA on HeLa breakpoint windows.** HeLa produces a single population as expected based on the stability of the cell line. Red and blue points indicate different preparations.

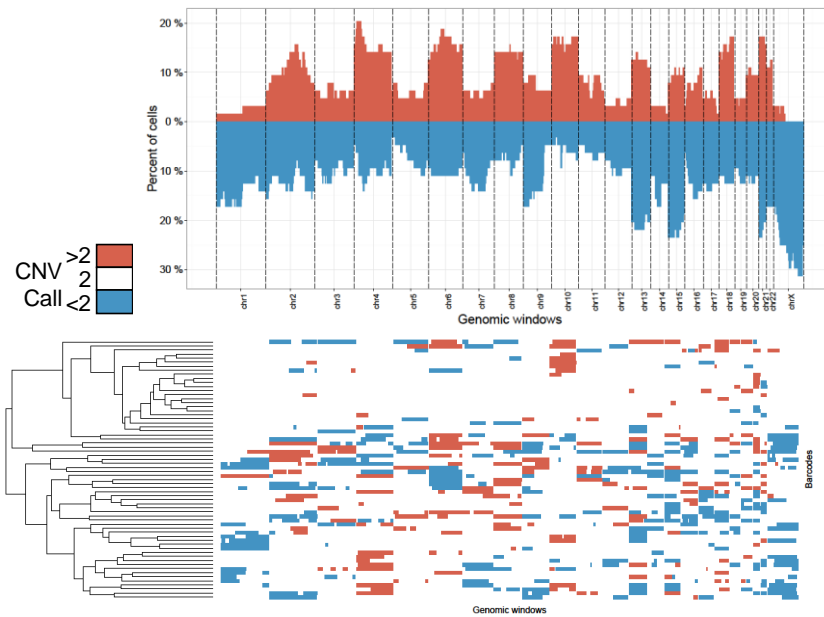

**Supplementary Figure 25 | SCI-seq using xSDS-based nucleosome depletion on a banked stage II rectal cancer sample.** Intersected copy number call summary for 2.5 Mbp windows.
